# Supplementary material for: Novel Structural Variation and Evolutionary Characteristics of Chloroplast tRNA in Gossypium Plants
Source: MDPI journal article supplement (doi:10.3390/genes12060822), 2021-05-27
Supplement: s1 [file s1]

Table S2. Distribution of anti-codons in cotton chloroplast genome.

[illegible]

|                             |    |    |    |    |    |    |    |    |    |    |
|-----------------------------|----|----|----|----|----|----|----|----|----|----|
| Glutamine CUG               | 0  | 0  | 0  | 0  | 0  | 0  | 0  | 0  | 0  | 0  |
| Glutamine UUG               | 1  | 1  | 1  | 1  | 1  | 1  | 1  | 1  | 1  | 1  |
| Isoleucine AAU              | 0  | 0  | 0  | 0  | 0  | 0  | 0  | 0  | 0  | 0  |
| Isoleucine GAU              | 2  | 2  | 2  | 2  | 2  | 2  | 2  | 2  | 2  | 2  |
| Isoleucine CAU              | 2  | 2  | 2  | 2  | 2  | 2  | 2  | 2  | 2  | 2  |
| Isoleucine UAU              | 0  | 0  | 0  | 0  | 0  | 0  | 0  | 0  | 0  | 0  |
| Methionine CAU              | 2  | 2  | 2  | 2  | 2  | 2  | 2  | 2  | 1  | 2  |
| Tyrosine AUA                | 0  | 0  | 0  | 0  | 0  | 0  | 0  | 0  | 0  | 0  |
| Tyrosine GUA                | 1  | 1  | 1  | 1  | 1  | 1  | 1  | 1  | 1  | 1  |
| Cysteine ACA                | 0  | 0  | 0  | 0  | 0  | 0  | 0  | 0  | 0  | 0  |
| Cysteine GCA                | 1  | 1  | 1  | 1  | 1  | 1  | 1  | 1  | 1  | 1  |
| Tryptophan CCA              | 1  | 1  | 1  | 1  | 1  | 1  | 1  | 1  | 1  | 1  |
| Suppressor CUA/ UUA/<br>UCA | 0  | 0  | 0  | 0  | 0  | 0  | 0  | 0  | 0  | 0  |
| Selenocysteine UCA          | 0  | 0  | 0  | 0  | 0  | 0  | 0  | 0  | 0  | 0  |
| Total of anticodon types    | 28 | 29 | 28 | 28 | 28 | 29 | 28 | 28 | 29 | 28 |

---

<sup>1</sup>*Gossypium arboreum*; <sup>2</sup>*Gossypium anomalum*; <sup>3</sup>*Gossypium robinsonii*; <sup>4</sup>*Gossypium klotzschianum*; <sup>5</sup>*Gossypium somalense*; <sup>6</sup>*Gossypium longicalyx*; <sup>7</sup>*Gossypium hirsutum*; <sup>8</sup>*Gossypium barbadense*; <sup>9</sup>*Gossypium bickii*; <sup>10</sup>*Gossypium populifolium*.
