# Supplementary material for: Novel Structural Variation and Evolutionary Characteristics of Chloroplast tRNA in Gossypium Plants
Source: MDPI journal article supplement (doi:10.3390/genes12060822), 2021-05-27
Supplement: s1 [file s1]

Table S4

Results of transition and transversion rates of chloroplast tRNAs.

| From\To    | A            | U            | C            | G            | From\To       | A            | U            | C            | G            |
|------------|--------------|--------------|--------------|--------------|---------------|--------------|--------------|--------------|--------------|
| Alanine    |              |              |              |              | Lysine        |              |              |              |              |
| A          | -            | 8.34         | 8.34         | <b>8.33</b>  | A             | -            | 3.37         | 3.37         | <b>18.27</b> |
| U          | 8.34         | -            | <b>8.33</b>  | 8.34         | U             | 3.37         | -            | <b>18.27</b> | 3.37         |
| C          | 8.34         | <b>8.33</b>  | -            | 8.34         | C             | 3.37         | <b>18.27</b> | -            | 3.37         |
| G          | <b>8.33</b>  | 8.34         | 8.34         | -            | G             | <b>18.27</b> | 3.37         | 3.37         | -            |
| Arginine   |              |              |              |              | Methionine    |              |              |              |              |
| A          | -            | 5.15         | 5.15         | <b>14.71</b> | A             | -            | 6.89         | 6.89         | <b>11.22</b> |
| U          | 5.15         | -            | <b>14.71</b> | 5.15         | U             | 6.89         | -            | <b>11.22</b> | 6.89         |
| C          | 5.15         | <b>14.71</b> | -            | 5.15         | C             | 6.89         | <b>11.22</b> | -            | 6.89         |
| G          | <b>14.71</b> | 5.15         | 5.15         | -            | G             | <b>11.22</b> | 6.89         | 6.89         | -            |
| Asparagine |              |              |              |              | Phenylalanine |              |              |              |              |
| A          | -            | 8.34         | 8.34         | <b>8.33</b>  | A             | -            | 8.34         | 8.34         | <b>8.33</b>  |
| U          | 8.34         | -            | <b>8.33</b>  | 8.34         | U             | 8.34         | -            | <b>8.33</b>  | 8.34         |
| C          | 8.34         | <b>8.33</b>  | -            | 8.34         | C             | 8.34         | <b>8.33</b>  | -            | 8.34         |
| G          | <b>8.33</b>  | 8.34         | 8.34         | -            | G             | <b>8.33</b>  | 8.34         | 8.34         | -            |
| Aspartate  |              |              |              |              | Proline       |              |              |              |              |
| A          | -            | 8.34         | 8.34         | <b>8.33</b>  | A             | -            | 8.34         | 8.34         | <b>8.33</b>  |
| U          | 8.34         | -            | <b>8.33</b>  | 8.34         | U             | 8.34         | -            | <b>8.33</b>  | 8.34         |
| C          | 8.34         | <b>8.33</b>  | -            | 8.34         | C             | 8.34         | <b>8.33</b>  | -            | 8.34         |
| G          | <b>8.33</b>  | 8.34         | 8.34         | -            | G             | <b>8.33</b>  | 8.34         | 8.34         | -            |
| Cysteine   |              |              |              |              | Serine        |              |              |              |              |
| A          | -            | 4.99         | 4.99         | <b>15.02</b> | A             | -            | 8.29         | 8.29         | <b>8.42</b>  |
| U          | 4.99         | -            | <b>15.02</b> | 4.99         | U             | 8.29         | -            | <b>8.42</b>  | 8.29         |
| C          | 4.99         | <b>15.02</b> | -            | 4.99         | C             | 8.29         | <b>8.42</b>  | -            | 8.29         |
| G          | <b>15.02</b> | 4.99         | 4.99         | -            | G             | <b>8.42</b>  | 8.29         | 8.29         | -            |
| Glutamine  |              |              |              |              | Threonine     |              |              |              |              |
| A          | -            | 9.77         | 9.77         | <b>5.46</b>  | A             | -            | 9.02         | 9.02         | <b>6.95</b>  |
| U          | 9.77         | -            | <b>5.46</b>  | 9.77         | U             | 9.02         | -            | <b>6.95</b>  | 9.02         |
| C          | 9.77         | <b>5.46</b>  | -            | 9.77         | C             | 9.02         | <b>6.95</b>  | -            | 9.02         |
| G          | <b>5.46</b>  | 9.77         | 9.77         | -            | G             | <b>6.95</b>  | 9.02         | 9.02         | -            |
| Glutamate  |              |              |              |              | Tryptophan    |              |              |              |              |
| A          | -            | 4.51         | 4.51         | <b>15.97</b> | A             | -            | 0.00         | 0.00         | <b>25.00</b> |
| U          | 4.51         | -            | <b>15.97</b> | 4.51         | U             | 0.00         | -            | <b>25.00</b> | 0.00         |
| C          | 4.51         | <b>15.97</b> | -            | 4.51         | C             | 0.00         | <b>25.00</b> | -            | 0.00         |
| G          | <b>15.97</b> | 4.51         | 4.51         | -            | G             | <b>25.00</b> | 0.00         | 0.00         | -            |
| Glycine    |              |              |              |              | Tyrosine      |              |              |              |              |
| A          | -            | 7.89         | 7.89         | <b>9.22</b>  | A             | -            | 8.34         | 8.34         | <b>8.33</b>  |
| U          | 7.89         | -            | <b>9.22</b>  | 7.89         | U             | 8.34         | -            | <b>8.33</b>  | 8.34         |
| C          | 7.89         | <b>9.22</b>  | -            | 7.89         | C             | 8.34         | <b>8.33</b>  | -            | 8.34         |
| G          | <b>9.22</b>  | 7.89         | 7.89         | -            | G             | <b>8.33</b>  | 8.34         | 8.34         | -            |
| Histidine  |              |              |              |              | Valine        |              |              |              |              |

|            |             |             |             |             |         |              |              |              |              |
|------------|-------------|-------------|-------------|-------------|---------|--------------|--------------|--------------|--------------|
| A          | -           | 12.50       | 12.50       | <b>0.00</b> | A       | -            | 8.34         | 8.34         | <b>8.33</b>  |
| U          | 12.50       | -           | <b>0.00</b> | 12.50       | U       | 8.34         | -            | <b>8.33</b>  | 8.34         |
| C          | 12.50       | <b>0.00</b> | -           | 12.50       | C       | 8.34         | <b>8.33</b>  | -            | 8.34         |
| G          | <b>0.00</b> | 12.50       | 12.50       | -           | G       | <b>8.33</b>  | 8.34         | 8.34         | -            |
| Isoleucine |             |             |             |             | Overall |              |              |              |              |
| A          | -           | 8.34        | 8.34        | <b>8.33</b> | A       | -            | 6.59         | 6.59         | <b>11.82</b> |
| U          | 8.34        | -           | <b>8.33</b> | 8.34        | U       | 6.59         | -            | <b>11.82</b> | 6.59         |
| C          | 8.34        | <b>8.33</b> | -           | 8.34        | C       | 6.59         | <b>11.82</b> | -            | 6.59         |
| G          | <b>8.33</b> | 8.34        | 8.34        | -           | G       | <b>11.82</b> | 6.59         | 6.59         | -            |
| Leucine    |             |             |             |             |         |              |              |              |              |
| A          | -           | 8.13        | 8.13        | <b>8.74</b> |         |              |              |              |              |
| U          | 8.13        | -           | <b>8.74</b> | 8.13        |         |              |              |              |              |
| C          | 8.13        | <b>8.74</b> | -           | 8.13        |         |              |              |              |              |
| G          | <b>8.74</b> | 8.13        | 8.13        | -           |         |              |              |              |              |
