# Supplementary material for: Novel Structural Variation and Evolutionary Characteristics of Chloroplast tRNA in Gossypium Plants
Source: MDPI journal article supplement (doi:10.3390/genes12060822), 2021-05-27
Supplement: s1 [file s1]

Table S5

Loss events of the chloroplast tRNAs

| tRNA<br>Gene ID | Species                 | tRNA | Anti-codon | Lost in Species                                                                                                                                            |
|-----------------|-------------------------|------|------------|------------------------------------------------------------------------------------------------------------------------------------------------------------|
| NC_018113       | <i>G. robinsonii</i>    | Ala  | UGC        | <i>G. anomalum</i>                                                                                                                                         |
| 139260          | <i>G. robinsonii</i>    | Ala  | UGC        | <i>G. anomalum</i>                                                                                                                                         |
| NC_033394       | <i>G. klotzschianum</i> | Ala  | UGC        | <i>G. anomalum</i> ,                                                                                                                                       |
| NC_018110       | <i>G. somalense</i>     | Ala  | UGC        | <i>G. anomalum</i> , <i>G. robinsonii</i> , <i>G. klotzschianum</i>                                                                                        |
| NC_023216       | <i>G. longicalyx</i>    | Ala  | UGC        | <i>G. somalense</i> , <i>G. anomalum</i> , <i>G. robinsonii</i> , <i>G. klotzschianum</i>                                                                  |
| 139620          | <i>G. longicalyx</i>    | Ala  | UGC        |                                                                                                                                                            |
| NC_023214       | <i>G. bickii</i>        | Ala  | UGC        | <i>G. longicalyx</i> , <i>G. somalense</i> , <i>G. anomalum</i> , <i>G. robinsonii</i> , <i>G. klotzschianum</i>                                           |
| 138830          | <i>G. bickii</i>        | Ala  | UGC        |                                                                                                                                                            |
| NC_033398       | <i>G. populifolium</i>  | Ala  | UGC        | <i>G. bickii</i> , <i>G. longicalyx</i> <i>G. somalense</i> <i>G. anomalum</i> <i>G. robinsonii</i> <i>G. klotzschianum</i>                                |
| 138856          | <i>G. populifolium</i>  | Ala  | UGC        | <i>G. bickii</i> , <i>G. arboreum</i> , <i>G. hirsutum</i> , <i>G. barbadense</i>                                                                          |
| NC_016712       | <i>G. arboreum</i>      | Cys  | GCG        | <i>G. arboreum</i>                                                                                                                                         |
| HQ901196        | <i>G. hirsutum</i>      | Ala  | UGC        |                                                                                                                                                            |
| 139691          | <i>G. hirsutum</i>      | Ala  | UGC        |                                                                                                                                                            |
| HQ901199        | <i>G. barbadense</i>    | Ala  | UGC        | <i>G. arboreum</i> , <i>G. hirsutum</i> , <i>G. bickii</i> , <i>G. longicalyx</i> , <i>G. somalense</i> , <i>G. populifolium</i> , <i>G. klotzschianum</i> |
| 139725          | <i>G. barbadense</i>    | Ala  | UGC        |                                                                                                                                                            |
| NC_023213       | <i>G. anomalum</i>      | Ala  | UGC        |                                                                                                                                                            |
| NC_016712       | <i>G. arboreum</i>      | Val  | GAC        | <i>G. arboreum</i> , <i>G. hirsutum</i> , <i>G. barbadense</i>                                                                                             |
| HQ901196        | <i>G. hirsutum</i>      | Val  | GAC        |                                                                                                                                                            |
| HQ901199        | <i>G. barbadense</i>    | Val  | GAC        |                                                                                                                                                            |
| NC_023213       | <i>G. anomalum</i>      | Val  | GAC        |                                                                                                                                                            |
| NC_018113       | <i>G. robinsonii</i>    | Val  | GAC        | <i>G. arboreum</i> , <i>G. hirsutum</i> , <i>G. barbadense</i>                                                                                             |
| NC_033394       | <i>G. klotzschianum</i> | Val  | GAC        |                                                                                                                                                            |

|           |                         |     |     |                                                                                                            |
|-----------|-------------------------|-----|-----|------------------------------------------------------------------------------------------------------------|
| NC_018110 | <i>G. somalense</i>     | Val | UAC |                                                                                                            |
| NC_033398 | <i>G. populifolium</i>  | Val | UAC |                                                                                                            |
| 143580    | <i>G. arboreum</i>      | Val | GAC |                                                                                                            |
| 143665    | <i>G. hirsutum</i>      | Val | GAC |                                                                                                            |
| 143697    | <i>G. barbadense</i>    | Val | GAC |                                                                                                            |
| 142858    | <i>G. anomalum</i>      | Val | GAC |                                                                                                            |
| 143238    | <i>G. robinsonii</i>    | Val | GAC |                                                                                                            |
| 105224    | <i>G. klotzschianum</i> | Val | GAC | <i>G. arboreum, G. anomalum, G. robinsonii, G. hirsutum, G. barbadense</i>                                 |
| 143457    | <i>G. klotzschianum</i> | Val | GAC |                                                                                                            |
| 142920    | <i>G. somalense</i>     | Val | GAC |                                                                                                            |
| NC_023216 | <i>G. longicalyx</i>    | Val | GAC | <i>G. arboreum, G. somalense, G. anomalum, G. robinsonii, G. hirsutum, G. klotzschianum, G. barbadense</i> |
| 143595    | <i>G. longicalyx</i>    | Val | GAC |                                                                                                            |
| 142803    | <i>G. bickii</i>        | Val | GAC | <i>G. arboreum G. longicalyx G. somalense G. anomalum G. robinsonii</i>                                    |
| 142829    | <i>G. populifolium</i>  | Val | GAC | <i>G. hirsutum G. populifolium G. klotzschianum G. barbadense</i>                                          |
| NC_023214 | <i>G. bickii</i>        | Val | GAC |                                                                                                            |
| 157311    | <i>G. bickii</i>        | Val | CAU |                                                                                                            |
| 54841     | <i>G. populifolium</i>  | Val | CAU | <i>G. arboreum, G. somalense, G. robinsonii, G. hirsutum, G. klotzschianum, G. barbadense</i>              |
| 90153     | <i>G. anomalum</i>      | Val | CAU |                                                                                                            |
| 90716     | <i>G. longicalyx</i>    | Val | CAU |                                                                                                            |
| NC_018113 | <i>G. robinsonii</i>    | Ile | CAU |                                                                                                            |
| NC_018110 | <i>G. somalense</i>     | Ile | CAU |                                                                                                            |
| HQ901199  | <i>G. barbadense</i>    | Ile | CAU | <i>G. klotzschianum</i>                                                                                    |
| NC_018113 | <i>G. hirsutum</i>      | Ile | CAU |                                                                                                            |
| NC_016712 | <i>G. arboreum</i>      | Ile | CAU |                                                                                                            |
| 143238    | <i>G. robinsonii</i>    | Val | GAC | <i>G. klotzschianum</i>                                                                                    |
| 142920    | <i>G. somalense</i>     | Val | GAC |                                                                                                            |

|           |                         |     |     |                                                               |                       |                          |                      |                      |  |
|-----------|-------------------------|-----|-----|---------------------------------------------------------------|-----------------------|--------------------------|----------------------|----------------------|--|
| 143697    | <i>G. barbadense</i>    | Val | GAC |                                                               |                       |                          |                      |                      |  |
| 143580    | <i>G. arboreum</i>      | Val | GAC |                                                               |                       |                          |                      |                      |  |
| 143665    | <i>G. hirsutum</i>      | Val | GAC |                                                               |                       |                          |                      |                      |  |
| NC_018113 | <i>G. robinsonii</i>    | Met | CAU |                                                               |                       |                          |                      |                      |  |
| NC_018110 | <i>G. somalense</i>     | Met | CAU |                                                               |                       |                          |                      |                      |  |
| NC_033394 | <i>G. klotzschianum</i> | Met | CAU | <i>G. bickii, G. longicalyx, G. anomalum, G. populifolium</i> |                       |                          |                      |                      |  |
| HQ901196  | <i>G. hirsutum</i>      | Met | CAU |                                                               |                       |                          |                      |                      |  |
| HQ901199  | <i>G. barbadense</i>    | Met | CAU |                                                               |                       |                          |                      |                      |  |
| NC_016712 | <i>G. arboreum</i>      | Met | CAU |                                                               |                       |                          |                      |                      |  |
| NC_016712 | <i>G. arboreum</i>      | Asn | GUU |                                                               |                       |                          |                      |                      |  |
| 134998    | <i>G. arboreum</i>      | Asn | GUU | <i>G. arboreum</i>                                            |                       |                          |                      |                      |  |
| HQ901196  | <i>G. hirsutum</i>      | Asn | GUU |                                                               |                       |                          |                      |                      |  |
| 135084    | <i>G. hirsutum</i>      | Asn | GUU |                                                               |                       |                          |                      |                      |  |
| HQ901199  | <i>G. barbadense</i>    | Asn | GUU | <i>G. arboreum, G. hirsutum</i>                               |                       |                          |                      |                      |  |
| 135122    | <i>G. barbadense</i>    | Asn | GUU |                                                               |                       |                          |                      |                      |  |
| NC_023213 | <i>G. anomalum</i>      | Asn | GUU |                                                               |                       |                          |                      |                      |  |
| 134299    | <i>G. anomalum</i>      | Asn | GUU | <i>G. arboreum</i>                                            | <i>G. hirsutum</i>    | <i>G. barbadense</i>     |                      |                      |  |
| NC_018113 | <i>G. robinsonii</i>    | Asn | GUU |                                                               |                       |                          |                      |                      |  |
| 134664    | <i>G. robinsonii</i>    | Asn | GUU | <i>G. arboreum</i>                                            | <i>G. anomalum</i>    | <i>G. hirsutum</i>       | <i>G. barbadense</i> |                      |  |
| NC_033394 | <i>G. klotzschianum</i> | Asn | GUU |                                                               |                       |                          |                      |                      |  |
| 134888    | <i>G. klotzschianum</i> | Asn | GUU | <i>G. arboreum</i>                                            | <i>G. anomalum</i>    | <i>G. robinsonii</i>     | <i>G. hirsutum</i>   | <i>G. barbadense</i> |  |
| NC_018110 | <i>G. somalense</i>     | Asn | GUU |                                                               |                       |                          |                      |                      |  |
| NC_023216 | <i>G. longicalyx</i>    | Asn | GUU | <i>G. arboreum,</i>                                           | <i>G. longicalyx,</i> | <i>G. somalense,</i>     | <i>G. anomalum,</i>  |                      |  |
| NC_023214 | <i>G. bickii</i>        | Asn | GUU |                                                               |                       |                          |                      |                      |  |
| 138830    | <i>G. bickii</i>        | Asn | GUU | <i>G. robinsonii,</i>                                         | <i>G. hirsutum,</i>   | <i>G. klotzschianum,</i> | <i>G. barbadense</i> |                      |  |
| 113251    | <i>G. somalense</i>     | Asn | GUU | <i>G. arboreum</i>                                            | <i>G. anomalum</i>    | <i>G. robinsonii</i>     |                      |                      |  |

|           |                         |     |     |                      |                         |                         |                     |
|-----------|-------------------------|-----|-----|----------------------|-------------------------|-------------------------|---------------------|
| 134366    | <i>G. somalense</i>     | Asn | GUU | <i>G. hirsutum</i>   | <i>G. klotzschianum</i> | <i>G. barbadense</i>    |                     |
| 134989    | <i>G. longicalyx</i>    | Asn | GUU | <i>G. arboreum</i>   | <i>G. longicalyx</i>    | <i>G. somalense</i>     | <i>G. anomalum</i>  |
| 113189    | <i>G. bickii</i>        | Asn | GUU | <i>G. robinsonii</i> | <i>G. hirsutum</i>      | <i>G. klotzschianum</i> |                     |
| NC_033398 | <i>G. populifolium</i>  | Asn | GUU | <i>G. arboreum</i>   | <i>G. bickii</i>        | <i>G. somalense</i>     | <i>G. anomalum</i>  |
| 134989    | <i>G. longicalyx</i>    | Asn | GUU | <i>G. robinsonii</i> | <i>G. hirsutum</i>      | <i>G. populifolium</i>  |                     |
|           |                         |     |     | <i>G. arboreum</i>   | <i>G. bickii</i>        | <i>G. longicalyx</i>    | <i>G. somalense</i> |
| 157311    | <i>G. populifolium</i>  | Asn | GUU | <i>G. anomalum</i>   | <i>G. robinsonii</i>    | <i>G. hirsutum</i>      |                     |
| 38805     | <i>G. arboreum</i>      | Ile | CAU |                      |                         |                         |                     |
| 55572     | <i>G. hirsutum</i>      | Ile | CAU |                      |                         |                         |                     |
| 55629     | <i>G. barbadense</i>    | Ile | CAU | <i>G. arboreum</i>   | <i>G. hirsutum</i>      | <i>G. barbadense</i>    |                     |
| NC_023213 | <i>G. anomalum</i>      | Ile | CAU |                      |                         |                         |                     |
| 54918     | <i>G. anomalum</i>      | Ile | CAU |                      |                         |                         |                     |
| 38562     | <i>G. robinsonii</i>    | Ile | CAU | <i>G. arboreum</i>   | <i>G. anomalum</i>      | <i>G. robinsonii</i>    |                     |
| NC_033394 | <i>G. klotzschianum</i> | Ile | CAU |                      |                         |                         |                     |
| 90703     | <i>G. klotzschianum</i> | Ile | CAU | <i>G. hirsutum</i>   | <i>G. klotzschianum</i> | <i>G. barbadense</i>    |                     |
| NC_023214 | <i>G. bickii</i>        | Ile | CAU |                      |                         |                         |                     |
|           |                         |     |     | <i>G. arboreum</i>   | <i>G. longicalyx</i>    | <i>G. somalense</i>     | <i>G. anomalum</i>  |
| 38305     | <i>G. bickii</i>        | Ile | CAU | <i>G. robinsonii</i> | <i>G. hirsutum</i>      | <i>G. klotzschianum</i> |                     |
| NC_033398 | <i>G. populifolium</i>  | Ile | CAU |                      |                         |                         |                     |
|           |                         |     |     | <i>G. arboreum</i>   | <i>G. bickii</i>        | <i>G. longicalyx</i>    | <i>G. hirsutum</i>  |
| 90257     | <i>G. populifolium</i>  | Ile | CAU | <i>G. somalense</i>  | <i>G. anomalum</i>      | <i>G. robinsonii</i>    |                     |
| 90153     | <i>G. anomalum</i>      | Ile | CAU | <i>G. bickii</i>     | <i>G. longicalyx</i>    | <i>G. anomalum</i>      |                     |

|           |                         |     |     |                      |                      |                         |                         |                      |
|-----------|-------------------------|-----|-----|----------------------|----------------------|-------------------------|-------------------------|----------------------|
| NC_023216 | <i>G. longicalyx</i>    | Ile | CAU |                      |                      |                         |                         |                      |
| 54819     | <i>G. bickii</i>        | Ile | CAU |                      |                      |                         |                         |                      |
| 55498     | <i>G. arboreum</i>      | Ile | CAU |                      |                      |                         |                         |                      |
| 90750     | <i>G. arboreum</i>      | Ile | CAU |                      |                      |                         |                         |                      |
| 90841     | <i>G. hirsutum</i>      | Ile | CAU |                      |                      |                         |                         |                      |
| 158182    | <i>G. hirsutum</i>      | Ile | CAU | <i>G. bickii</i>     | <i>G. arboreum</i>   | <i>G. longicalyx</i>    | <i>G. anomalum</i>      |                      |
| 90868     | <i>G. barbadense</i>    | Ile | CAU |                      |                      |                         |                         |                      |
| 158188    | <i>G. barbadense</i>    | Ile | CAU | <i>G. bickii</i>     | <i>G. arboreum</i>   | <i>G. longicalyx</i>    | <i>G. anomalum</i>      | <i>G. hirsutum</i>   |
| 157384    | <i>G. anomalum</i>      | Ile | CAU | <i>G. bickii</i>     | <i>G. arboreum</i>   | <i>G. longicalyx</i>    | <i>G. hirsutum</i>      | <i>G. barbadense</i> |
| 55184     | <i>G. robinsonii</i>    | Ile | CAU | <i>G. bickii</i>     | <i>G. arboreum</i>   | <i>G. longicalyx</i>    |                         |                      |
| 90537     | <i>G. robinsonii</i>    | Ile | CAU | <i>G. anomalum</i>   | <i>G. hirsutum</i>   | <i>G. barbadense</i>    |                         |                      |
| NC_033394 | <i>G. klotzschianum</i> | Ile | CAU | <i>G. bickii</i>     | <i>G. arboreum</i>   | <i>G. longicalyx</i>    |                         |                      |
| 55395     | <i>G. klotzschianum</i> | Ile | CAU | <i>G. anomalum</i>   | <i>G. robinsonii</i> | <i>G. hirsutum</i>      | <i>G. barbadense</i>    |                      |
| 38485     | <i>G. somalense</i>     | Ile | CAU | <i>G. bickii</i>     | <i>G. arboreum</i>   | <i>G. longicalyx</i>    |                         |                      |
| 54980     | <i>G. somalense</i>     | Ile | CAU | <i>G. robinsonii</i> | <i>G. hirsutum</i>   | <i>G. barbadense</i>    | <i>G. anomalum</i>      |                      |
| 38826     | <i>G. longicalyx</i>    | Ile | CAU | <i>G. robinsonii</i> | <i>G. hirsutum</i>   | <i>G. klotzschianum</i> | <i>G. klotzschianum</i> |                      |
|           |                         |     |     | <i>G. bickii</i>     | <i>G. arboreum</i>   | <i>G. somalense</i>     | <i>G. anomalum</i>      |                      |
| 90127     | <i>G. bickii</i>        | Ile | CAU | <i>G. arboreum</i>   | <i>G. longicalyx</i> | <i>G. somalense</i>     | <i>G. anomalum</i>      |                      |
|           |                         |     |     | <i>G. robinsonii</i> | <i>G. hirsutum</i>   |                         |                         |                      |
| 38207     | <i>G. populifolium</i>  | Ile | CAU | <i>G. bickii</i>     | <i>G. arboreum</i>   | <i>G. longicalyx</i>    | <i>G. somalense</i>     |                      |
| 54841     | <i>G. populifolium</i>  | Ile | CAU | <i>G. anomalum</i>   | <i>G. robinsonii</i> | <i>G. hirsutum</i>      |                         |                      |
| NC_033398 | <i>G. populifolium</i>  | Arg | ACG |                      |                      |                         |                         |                      |
| 112605    | <i>G. populifolium</i>  | Arg | ACG | <i>G. longicalyx</i> |                      |                         |                         |                      |
| NC_023216 | <i>G. longicalyx</i>    | Arg | ACG |                      |                      |                         |                         |                      |

|           |                         |     |     |                      |                                           |                         |                      |                      |                      |
|-----------|-------------------------|-----|-----|----------------------|-------------------------------------------|-------------------------|----------------------|----------------------|----------------------|
| NC_016712 | <i>G. arboreum</i>      | Arg | ACG |                      |                                           |                         |                      |                      |                      |
| 113156    | <i>G. arboreum</i>      | Arg | ACG |                      |                                           |                         |                      |                      |                      |
| HQ901196  | <i>G. hirsutum</i>      | Arg | ACG |                      |                                           |                         |                      |                      |                      |
| 113241    | <i>G. hirsutum</i>      | Arg | ACG | <i>G. arboreum</i>   | <i>G. longicalyx</i>                      |                         |                      |                      |                      |
| HQ901199  | <i>G. barbadense</i>    | Arg | ACG |                      |                                           |                         |                      |                      |                      |
| 113264    | <i>G. barbadense</i>    | Arg | ACG | <i>G. arboreum</i>   | <i>G. longicalyx</i>                      | <i>G. hirsutum</i>      |                      |                      |                      |
| NC_023213 | <i>G. anomalum</i>      | Arg | ACG |                      |                                           |                         |                      |                      |                      |
| 112540    | <i>G. anomalum</i>      | Arg | ACG | <i>G. arboreum</i>   | <i>G. longicalyx</i>                      | <i>G. hirsutum</i>      | <i>G. barbadense</i> |                      |                      |
| NC_018113 | <i>G. robinsonii</i>    | Arg | ACG |                      |                                           |                         |                      |                      |                      |
| 112895    | <i>G. robinsonii</i>    | Arg | ACG | <i>G. arboreum</i>   | <i>G. longicalyx</i>                      | <i>G. anomalum</i>      | <i>G. hirsutum</i>   | <i>G. barbadense</i> |                      |
| NC_033394 | <i>G. klotzschianum</i> | Arg | ACG |                      |                                           |                         |                      |                      |                      |
| 113092    | <i>G. klotzschianum</i> | Arg | ACG | <i>G. arboreum</i>   | <i>G. longicalyx</i>                      | <i>G. anomalum</i>      | <i>G. robinsonii</i> | <i>G. hirsutum</i>   | <i>G. barbadense</i> |
| NC_018110 | <i>G. somalense</i>     | Arg | ACG | <i>G. arboreum</i>   | <i>G. longicalyx</i>                      | <i>G. anomalum</i>      |                      |                      |                      |
| 112552    | <i>G. somalense</i>     | Arg | ACG | <i>G. robinsonii</i> | <i>G. hirsutum</i>                        | <i>G. klotzschianum</i> | <i>G. barbadense</i> |                      |                      |
|           |                         |     |     | <i>G. arboreum</i>   |                                           | <i>G. anomalum</i>      |                      |                      |                      |
| 135692    | <i>G. longicalyx</i>    | Arg | ACG | <i>G. robinsonii</i> | <i>G. somalense</i><br><i>G. hirsutum</i> | <i>G. klotzschianum</i> | <i>G. barbadense</i> |                      |                      |
| NC_023214 | <i>G. bickii</i>        | Arg | ACG | <i>G. arboreum</i>   | <i>G. longicalyx</i>                      | <i>G. somalense</i>     | <i>G. anomalum</i>   |                      |                      |
| 112485    | <i>G. bickii</i>        | Arg | ACG | <i>G. robinsonii</i> | <i>G. hirsutum</i>                        | <i>G. klotzschianum</i> | <i>G. barbadense</i> |                      |                      |
| NC_016712 | <i>G. arboreum</i>      | Leu | CAA |                      |                                           |                         |                      |                      |                      |
| 150083    | <i>G. arboreum</i>      | Leu | CAA | <i>G. arboreum</i>   |                                           |                         |                      |                      |                      |
| HQ901196  | <i>G. hirsutum</i>      | Leu | CAA |                      |                                           |                         |                      |                      |                      |
| 150158    | <i>G. hirsutum</i>      | Leu | CAA |                      |                                           |                         |                      |                      |                      |
| HQ901199  | <i>G. barbadense</i>    | Leu | CAA |                      |                                           |                         |                      |                      |                      |
| 150164    | <i>G. barbadense</i>    | Leu | CAA | <i>G. arboreum</i>   | <i>G. hirsutum</i>                        |                         |                      |                      |                      |
| NC_023213 | <i>G. anomalum</i>      | Leu | CAA |                      |                                           |                         |                      |                      |                      |

|           |                         |     |     |                      |                       |                         |                          |                         |                         |
|-----------|-------------------------|-----|-----|----------------------|-----------------------|-------------------------|--------------------------|-------------------------|-------------------------|
| 149348    | <i>G. anomalum</i>      | Leu | CAA | <i>G. arboreum</i>   | <i>G. hirsutum</i>    | <i>G. barbadense</i>    |                          |                         |                         |
| NC_018113 | <i>G. robinsonii</i>    | Leu | CAA |                      |                       |                         |                          |                         |                         |
| 149700    | <i>G. robinsonii</i>    | Leu | CAA | <i>G. arboreum</i>   | <i>G. anomalum</i>    | <i>G. hirsutum</i>      | <i>G. barbadense</i>     |                         |                         |
| NC_033394 | <i>G. klotzschianum</i> | Leu | CAA |                      |                       |                         |                          |                         |                         |
| 98714     | <i>G. klotzschianum</i> | Leu | CAA | <i>G. arboreum</i>   | <i>G. anomalum</i>    | <i>G. robinsonii</i>    | <i>G. hirsutum</i>       | <i>G. barbadense</i>    |                         |
| NC_018110 | <i>G. somalense</i>     | Leu | CAA |                      |                       |                         |                          |                         |                         |
| 98210     | <i>G. somalense</i>     | Leu | CAA | <i>G. arboreum</i>   | <i>G. anomalum</i>    | <i>G. robinsonii</i>    | <i>G. hirsutum</i>       | <i>G. klotzschianum</i> | <i>G. barbadense</i>    |
| NC_023216 | <i>G. longicalyx</i>    | Leu | CAA | <i>G. arboreum</i>   | <i>G. somalense</i>   | <i>G. anomalum</i>      |                          |                         |                         |
| 50170     | <i>G. longicalyx</i>    | Leu | CAA | <i>G. robinsonii</i> | <i>G. hirsutum</i>    | <i>G. klotzschianum</i> | <i>G. barbadense</i>     |                         |                         |
| NC_023214 | <i>G. bickii</i>        | Leu | CAA | <i>G. longicalyx</i> | <i>G. somalense</i>   | <i>G. anomalum</i>      | <i>G. arboreum</i>       |                         |                         |
| 98143     | <i>G. bickii</i>        | Leu | CAA | <i>G. robinsonii</i> | <i>G. hirsutum</i>    | <i>G. klotzschianum</i> | <i>G. barbadense</i>     |                         |                         |
| NC_033398 | <i>G. populifolium</i>  | Leu | CAA | <i>G. arboreum,</i>  | <i>G. bickii,</i>     | <i>G. longicalyx,</i>   | <i>G. somalense</i>      |                         |                         |
| 98273     | <i>G. populifolium</i>  | Leu | CAA | <i>G. anomalum,</i>  | <i>G. robinsonii,</i> | <i>G. hirsutum,</i>     | <i>G. klotzschianum,</i> | <i>G. barbadense</i>    |                         |
| 98857     | <i>G. hirsutum</i>      | Leu | UAA |                      |                       |                         |                          |                         |                         |
| 98884     | <i>G. barbadense</i>    | Leu | UAA | <i>G. arboreum,</i>  | <i>G. bickii,</i>     | <i>G. longicalyx,</i>   | <i>G. anomalum,</i>      | <i>G. populifolium,</i> | <i>G. klotzschianum</i> |
| NC_018110 | <i>G. somalense</i>     | Leu | UAA |                      |                       |                         |                          |                         |                         |
| 49880     | <i>G. robinsonii</i>    | Leu | UAA |                      |                       |                         |                          |                         |                         |
| 50162     | <i>G. arboreum</i>      | Leu | UAA |                      |                       |                         |                          |                         |                         |
| 50059     | <i>G. klotzschianum</i> | Leu | UAA |                      |                       |                         |                          |                         |                         |
| 49616     | <i>G. populifolium</i>  | Leu | UAA | <i>G. somalense,</i> | <i>G. robinsonii,</i> | <i>G. hirsutum,</i>     | <i>G. barbadense</i>     |                         |                         |
| 50170     | <i>G. longicalyx</i>    | Leu | UAA |                      |                       |                         |                          |                         |                         |
| 49547     | <i>G. bickii</i>        | Leu | UAA |                      |                       |                         |                          |                         |                         |
| 49670     | <i>G. anomalum</i>      | Leu | UAA |                      |                       |                         |                          |                         |                         |
| NC_016712 | <i>G. arboreum</i>      | Met | CAU |                      |                       |                         |                          |                         |                         |
| HQ901196  | <i>G. hirsutum</i>      | Met | CAU | <i>G. bickii</i>     |                       |                         |                          |                         |                         |
| HQ901199  | <i>G. barbadense</i>    | Met | CAU |                      |                       |                         |                          |                         |                         |

|           |                         |     |     |
|-----------|-------------------------|-----|-----|
| NC_023213 | <i>G. anomalum</i>      | Met | CAU |
| NC_018113 | <i>G. robinsonii</i>    | Met | CAU |
| NC_033394 | <i>G. klotzschianum</i> | Met | CAU |
| NC_018110 | <i>G. somalense</i>     | Met | CAU |
| NC_033398 | <i>G. populifolium</i>  | Met | CAU |
| NC_023216 | <i>G. longicalyx</i>    | Met | CAU |

---
