# Supplementary material for: Novel Structural Variation and Evolutionary Characteristics of Chloroplast tRNA in Gossypium Plants
Source: MDPI journal article supplement (doi:10.3390/genes12060822), 2021-05-27
Supplement: s1 [file s1]

Table S3

Nucleotide composition in acceptor arm (AA), D-arm (DA), D-loop (DL), anti-codon arm (ACA), anti-codon loop (ACL), variable loop (VL), pseudouridine arm (ΨA), and pseudouridine loop (ΨL) of chloroplast tRNA

|                                       | AA | DA | DL | ACA | ACL | VL | ΨA | ΨL |
|---------------------------------------|----|----|----|-----|-----|----|----|----|
| Alanine                               |    |    |    |     |     |    |    |    |
| <i>Gossypium arboreum</i> 108456      | 7  | 4  | 8  | 5   | 7   | 5  | 5  | 7  |
| <i>Gossypium anomalum</i> 107857      | 7  | 4  | 8  | 5   | 7   | 5  | 5  | 7  |
| <i>Gossypium robinsonii</i> 108207    | 7  | 4  | 8  | 5   | 7   | 5  | 5  | 7  |
| <i>Gossypium klotzschianum</i> 108399 | 7  | 4  | 8  | 5   | 7   | 5  | 5  | 7  |
| <i>Gossypium somalense</i> 107874     | 7  | 4  | 8  | 5   | 7   | 5  | 5  | 7  |
| <i>Gossypium longicalyx</i> 139620    | 7  | 4  | 8  | 5   | 7   | 5  | 5  | 7  |
| <i>Gossypium bickii</i> 107797        | 7  | 4  | 8  | 5   | 7   | 5  | 5  | 7  |
| <i>Gossypium hirsutum</i> 108520      | 7  | 4  | 8  | 5   | 7   | 5  | 5  | 7  |
| <i>Gossypium barbadense</i> 108564    | 7  | 4  | 8  | 5   | 7   | 5  | 5  | 7  |
| <i>Gossypium populifolium</i> 107917  | 7  | 4  | 8  | 5   | 7   | 5  | 5  | 7  |
| <i>Gossypium arboreum</i> 139606      | 7  | 4  | 8  | 5   | 7   | 5  | 5  | 7  |
| <i>Gossypium anomalum</i> 138885      | 7  | 4  | 8  | 5   | 7   | 5  | 5  | 7  |
| <i>Gossypium robinsonii</i> 139260    | 7  | 4  | 8  | 5   | 7   | 5  | 5  | 7  |
| <i>Gossypium klotzschianum</i> 139484 | 7  | 4  | 8  | 5   | 7   | 5  | 5  | 7  |
| <i>Gossypium somalense</i> 138947     | 7  | 4  | 8  | 5   | 7   | 5  | 5  | 7  |
| <i>Gossypium longicalyx</i> 108420    | 7  | 4  | 8  | 5   | 7   | 5  | 5  | 7  |
| <i>Gossypium bickii</i> 138830        | 7  | 4  | 8  | 5   | 7   | 5  | 5  | 7  |
| <i>Gossypium hirsutum</i> 139667      | 7  | 4  | 8  | 5   | 7   | 5  | 5  | 7  |
| <i>Gossypium barbadense</i> 139697    | 7  | 4  | 8  | 5   | 7   | 5  | 5  | 7  |
| <i>Gossypium populifolium</i> 138856  | 7  | 4  | 8  | 5   | 7   | 5  | 5  | 7  |
| Arginine                              |    |    |    |     |     |    |    |    |
| <i>Gossypium arboreum</i> 10181       | 7  | 4  | 8  | 5   | 7   | 4  | 5  | 7  |
| <i>Gossypium arboreum</i> 135702      | 7  | 4  | 9  | 5   | 7   | 5  | 5  | 5  |
| <i>Gossypium arboreum</i> 113156      | 7  | 4  | 9  | 5   | 7   | 5  | 5  | 5  |
| <i>Gossypium anomalum</i> 10186       | 7  | 4  | 8  | 5   | 7   | 4  | 5  | 7  |
| <i>Gossypium anomalum</i> 112540      | 7  | 4  | 9  | 5   | 7   | 5  | 5  | 5  |
| <i>Gossypium anomalum</i> 134998      | 7  | 4  | 9  | 5   | 7   | 5  | 5  | 5  |
| <i>Gossypium robinsonii</i> 10304     | 7  | 4  | 8  | 5   | 7   | 4  | 5  | 7  |
| <i>Gossypium robinsonii</i> 112895    | 7  | 4  | 9  | 5   | 7   | 5  | 5  | 5  |
| <i>Gossypium robinsonii</i> 135368    | 7  | 4  | 9  | 5   | 7   | 5  | 5  | 5  |
| <i>Gossypium klotzschianum</i> 10146  | 7  | 4  | 8  | 5   | 7   | 4  | 5  | 7  |
| <i>Gossypium klotzschianum</i> 113092 | 7  | 4  | 9  | 5   | 7   | 5  | 5  | 5  |
| <i>Gossypium klotzschianum</i> 135587 | 7  | 4  | 9  | 5   | 7   | 5  | 5  | 5  |
| <i>Gossypium somalense</i> 10120      | 7  | 4  | 8  | 5   | 7   | 4  | 5  | 7  |
| <i>Gossypium somalense</i> 112552     | 7  | 4  | 9  | 5   | 7   | 5  | 5  | 5  |
| <i>Gossypium somalense</i> 135065     | 7  | 4  | 9  | 5   | 7   | 5  | 5  | 5  |
| <i>Gossypium longicalyx</i> 113143    | 7  | 4  | 8  | 5   | 7   | 4  | 5  | 7  |
| <i>Gossypium longicalyx</i> 10198     | 7  | 4  | 9  | 5   | 7   | 5  | 5  | 5  |
| <i>Gossypium longicalyx</i> 113143    | 7  | 4  | 9  | 5   | 7   | 5  | 5  | 5  |
| <i>Gossypium bickii</i> 10111         | 7  | 4  | 8  | 5   | 7   | 4  | 5  | 7  |
| <i>Gossypium bickii</i> 112485        | 7  | 4  | 9  | 5   | 7   | 5  | 5  | 5  |

|                                       |   |   |   |   |   |   |   |   |
|---------------------------------------|---|---|---|---|---|---|---|---|
| <i>Gossypium bickii</i> 134938        | 7 | 4 | 9 | 5 | 7 | 5 | 5 | 5 |
| <i>Gossypium hirsutum</i> 113224      | 7 | 4 | 8 | 5 | 7 | 4 | 5 | 7 |
| <i>Gossypium hirsutum</i> 10222       | 7 | 4 | 9 | 5 | 7 | 5 | 5 | 5 |
| <i>Gossypium hirsutum</i> 135759      | 7 | 4 | 9 | 5 | 7 | 5 | 5 | 5 |
| <i>Gossypium barbadense</i> 113264    | 7 | 4 | 8 | 5 | 7 | 4 | 5 | 7 |
| <i>Gossypium barbadense</i> 10233     | 7 | 4 | 9 | 5 | 7 | 5 | 5 | 5 |
| <i>Gossypium barbadense</i> 135793    | 7 | 4 | 9 | 5 | 7 | 5 | 5 | 5 |
| <i>Gossypium populifolium</i> 10180   | 7 | 4 | 8 | 5 | 7 | 4 | 5 | 7 |
| <i>Gossypium populifolium</i> 112605  | 7 | 4 | 9 | 5 | 7 | 5 | 5 | 5 |
| <i>Gossypium populifolium</i> 134964  | 7 | 4 | 9 | 5 | 7 | 5 | 5 | 5 |
| Asparagine                            |   |   |   |   |   |   |   |   |
| <i>Gossypium arboreum</i> 113861      | 7 | 4 | 7 | 5 | 7 | 5 | 5 | 7 |
| <i>Gossypium arboreum</i> 134999      | 7 | 4 | 7 | 5 | 7 | 5 | 5 | 7 |
| <i>Gossypium anomalum</i> 113240      | 7 | 4 | 7 | 5 | 7 | 5 | 5 | 7 |
| <i>Gossypium anomalum</i> 134300      | 7 | 4 | 7 | 5 | 7 | 5 | 5 | 7 |
| <i>Gossypium robinsonii</i> 113600    | 7 | 4 | 7 | 5 | 7 | 5 | 5 | 7 |
| <i>Gossypium robinsonii</i> 134665    | 7 | 4 | 7 | 5 | 7 | 5 | 5 | 7 |
| <i>Gossypium klotzschianum</i> 113792 | 7 | 4 | 7 | 5 | 7 | 5 | 5 | 7 |
| <i>Gossypium klotzschianum</i> 134889 | 7 | 4 | 7 | 5 | 7 | 5 | 5 | 7 |
| <i>Gossypium somalense</i> 113252     | 7 | 4 | 7 | 5 | 7 | 5 | 5 | 7 |
| <i>Gossypium somalense</i> 134367     | 7 | 4 | 7 | 5 | 7 | 5 | 5 | 7 |
| <i>Gossypium longicalyx</i> 113849    | 7 | 4 | 7 | 5 | 7 | 5 | 5 | 7 |
| <i>Gossypium longicalyx</i> 134990    | 7 | 4 | 7 | 5 | 7 | 5 | 5 | 7 |
| <i>Gossypium bickii</i> 113190        | 7 | 4 | 7 | 5 | 7 | 5 | 5 | 7 |
| <i>Gossypium bickii</i> 134235        | 7 | 4 | 7 | 5 | 7 | 5 | 5 | 7 |
| <i>Gossypium hirsutum</i> 113924      | 7 | 4 | 7 | 5 | 7 | 5 | 5 | 7 |
| <i>Gossypium hirsutum</i> 135061      | 7 | 4 | 7 | 5 | 7 | 5 | 5 | 7 |
| <i>Gossypium barbadense</i> 113964    | 7 | 4 | 7 | 5 | 7 | 5 | 5 | 7 |
| <i>Gossypium barbadense</i> 135095    | 7 | 4 | 7 | 5 | 7 | 5 | 5 | 7 |
| <i>Gossypium populifolium</i> 113310  | 7 | 4 | 7 | 5 | 7 | 5 | 5 | 7 |
| <i>Gossypium populifolium</i> 134261  | 7 | 4 | 7 | 5 | 7 | 5 | 5 | 7 |
| Aspartate                             |   |   |   |   |   |   |   |   |
| <i>Gossypium arboreum</i> 31364       | 7 | 4 | 9 | 5 | 7 | 5 | 5 | 7 |
| <i>Gossypium anomalum</i> 31288       | 7 | 4 | 9 | 5 | 7 | 5 | 5 | 7 |
| <i>Gossypium robinsonii</i> 31177     | 7 | 4 | 9 | 5 | 7 | 5 | 5 | 7 |
| <i>Gossypium klotzschianum</i> 31308  | 7 | 4 | 9 | 5 | 7 | 5 | 5 | 7 |
| <i>Gossypium somalense</i> 31197      | 7 | 4 | 9 | 5 | 7 | 5 | 5 | 7 |
| <i>Gossypium longicalyx</i> 31396     | 7 | 4 | 9 | 5 | 7 | 5 | 5 | 7 |
| <i>Gossypium bickii</i> 30957         | 7 | 4 | 9 | 5 | 7 | 5 | 5 | 7 |
| <i>Gossypium hirsutum</i> 31439       | 7 | 4 | 9 | 5 | 7 | 5 | 5 | 7 |
| <i>Gossypium barbadense</i> 31387     | 7 | 4 | 9 | 5 | 7 | 5 | 5 | 7 |
| <i>Gossypium populifolium</i> 31052   | 7 | 4 | 9 | 5 | 7 | 5 | 5 | 7 |
| Cysteine                              |   |   |   |   |   |   |   |   |
| <i>Gossypium longicalyx</i> 28898     | 7 | 3 | 9 | 5 | 7 | 5 | 5 | 7 |
| <i>Gossypium arboreum</i> 28868       | 7 | 3 | 9 | 5 | 7 | 5 | 5 | 7 |
| <i>Gossypium anomalum</i> 28806       | 7 | 3 | 9 | 5 | 7 | 5 | 5 | 7 |
| <i>Gossypium klotzschianum</i> 28812  | 7 | 3 | 9 | 5 | 7 | 5 | 5 | 7 |
| <i>Gossypium robinsonii</i> 28954     | 7 | 3 | 9 | 5 | 7 | 5 | 5 | 7 |
| <i>Gossypium somalense</i> 28718      | 7 | 3 | 9 | 5 | 7 | 5 | 5 | 7 |

|                                      |   |   |    |   |   |   |   |   |
|--------------------------------------|---|---|----|---|---|---|---|---|
| <i>Gossypium hirsutum</i> 28902      | 7 | 3 | 9  | 5 | 7 | 5 | 5 | 7 |
| <i>Gossypium bickii</i> 28730        | 7 | 3 | 9  | 5 | 7 | 5 | 5 | 7 |
| <i>Gossypium barbadense</i> 28896    | 7 | 3 | 9  | 5 | 7 | 5 | 5 | 7 |
| <i>Gossypium populifolium</i> 28813  |   | 3 | 9  | 5 | 7 | 5 | 5 | 7 |
| Glutamate                            |   |   |    |   |   |   |   |   |
| <i>Gossypium arboreum</i> 32085      | 7 | 4 | 9  | 5 | 7 | 4 | 5 | 7 |
| <i>Gossypium anomalum</i> 32004      | 7 | 4 | 9  | 5 | 7 | 4 | 5 | 7 |
| <i>Gossypium robinsonii</i> 31898    | 7 | 4 | 9  | 5 | 7 | 4 | 5 | 7 |
| <i>Gossypium klotzschianum</i> 32030 | 7 | 4 | 9  | 5 | 7 | 4 | 5 | 7 |
| <i>Gossypium somalense</i> 31914     | 7 | 4 | 7  | 5 | 7 | 5 | 5 | 7 |
| <i>Gossypium longicalyx</i> 32117    | 7 | 4 | 7  | 5 | 7 | 5 | 5 | 7 |
| <i>Gossypium bickii</i> 31679        | 7 | 4 | 9  | 5 | 7 | 4 | 5 | 7 |
| <i>Gossypium hirsutum</i> 32159      | 7 | 4 | 9  | 5 | 7 | 4 | 5 | 7 |
| <i>Gossypium barbadense</i> 32108    | 7 | 4 | 7  | 5 | 7 | 5 | 5 | 7 |
| <i>Gossypium populifolium</i> 31641  | 7 | 4 | 7  | 5 | 7 | 5 | 5 | 7 |
| Glutamine                            |   |   |    |   |   |   |   |   |
| <i>Gossypium arboreum</i> 6969       | 7 | 3 | 9  | 4 | 7 | 6 | 5 | 7 |
| <i>Gossypium anomalum</i> 6980       | 7 | 3 | 9  | 4 | 7 | 6 | 5 | 7 |
| <i>Gossypium robinsonii</i> 7083     | 7 | 3 | 9  | 4 | 7 | 6 | 5 | 7 |
| <i>Gossypium klotzschianum</i> 6917  | 7 | 3 | 9  | 4 | 7 | 6 | 5 | 7 |
| <i>Gossypium somalense</i> 6935      | 7 | 3 | 9  | 4 | 7 | 6 | 5 | 7 |
| <i>Gossypium longicalyx</i> 6949     | 7 | 3 | 9  | 4 | 7 | 6 | 5 | 7 |
| <i>Gossypium bickii</i> 6873         | 7 | 3 | 9  | 4 | 7 | 6 | 5 | 7 |
| <i>Gossypium hirsutum</i> 6968       | 7 | 3 | 9  | 4 | 7 | 6 | 5 | 7 |
| <i>Gossypium barbadense</i> 6983     | 7 | 3 | 9  | 4 | 7 | 6 | 5 | 7 |
| <i>Gossypium populifolium</i> 6956   | 7 | 3 | 9  | 5 | 7 | 4 | 5 | 7 |
| Glycine                              |   |   |    |   |   |   |   |   |
| <i>Gossypium arboreum</i> 38583      | 7 | 2 | 11 | 5 | 7 | 4 | 5 | 7 |
| <i>Gossypium arboreum</i> 9147       | 7 | 2 | 11 | 5 | 7 | 4 | 5 | 7 |
| <i>Gossypium anomalum</i> 38166      | 7 | 2 | 11 | 5 | 7 | 4 | 5 | 7 |
| <i>Gossypium anomalum</i> 9156       | 7 | 2 | 11 | 5 | 7 | 4 | 5 | 7 |
| <i>Gossypium robinsonii</i> 38341    | 7 | 2 | 11 | 5 | 7 | 4 | 5 | 7 |
| <i>Gossypium robinsonii</i> 9259     | 7 | 2 | 11 | 5 | 7 | 4 | 5 | 7 |
| <i>Gossypium klotzschianum</i> 38505 | 7 | 2 | 11 | 5 | 7 | 4 | 5 | 7 |
| <i>Gossypium klotzschianum</i> 9103  | 7 | 2 | 11 | 5 | 7 | 4 | 5 | 7 |
| <i>Gossypium somalense</i> 38262     | 7 | 2 | 11 | 5 | 7 | 4 | 5 | 7 |
| <i>Gossypium somalense</i> 9092      | 7 | 2 | 11 | 5 | 7 | 4 | 5 | 7 |
| <i>Gossypium longicalyx</i> 9128     | 7 | 2 | 11 | 5 | 7 | 4 | 5 | 7 |
| <i>Gossypium longicalyx</i> 38604    | 7 | 2 | 11 | 5 | 7 | 4 | 5 | 7 |
| <i>Gossypium bickii</i> 38084        | 7 | 2 | 11 | 5 | 7 | 4 | 5 | 7 |
| <i>Gossypium bickii</i> 9053         | 7 | 2 | 11 | 5 | 7 | 4 | 5 | 7 |
| <i>Gossypium hirsutum</i> 38655      | 7 | 2 | 11 | 5 | 7 | 4 | 5 | 7 |
| <i>Gossypium hirsutum</i> 9164       | 7 | 2 | 11 | 5 | 7 | 4 | 5 | 7 |
| <i>Gossypium barbadense</i> 38694    | 7 | 2 | 11 | 5 | 7 | 4 | 5 | 7 |
| <i>Gossypium barbadense</i> 9175     | 7 | 2 | 11 | 5 | 7 | 4 | 5 | 7 |
| <i>Gossypium populifolium</i> 37985  | 7 | 2 | 11 | 5 | 7 | 4 | 5 | 7 |
| <i>Gossypium populifolium</i> 9134   | 7 | 2 | 11 | 5 | 7 | 4 | 5 | 7 |
| Histidine                            |   |   |    |   |   |   |   |   |
| <i>Gossypium arboreum</i> 3          | 7 | 3 | 11 | 5 | 7 | 5 | 5 | 7 |

|                                       |   |   |    |   |   |   |   |   |
|---------------------------------------|---|---|----|---|---|---|---|---|
| <i>Gossypium anomalum</i> 23          | 7 | 3 | 11 | 5 | 7 | 5 | 5 | 7 |
| <i>Gossypium robinsonii</i> 122       | 7 | 3 | 11 | 5 | 7 | 5 | 5 | 7 |
| <i>Gossypium klotzschianum</i> 1      | 7 | 3 | 11 | 5 | 7 | 5 | 5 | 7 |
| <i>Gossypium somalense</i> 6          | 7 | 3 | 11 | 5 | 7 | 5 | 5 | 7 |
| <i>Gossypium longicalyx</i> 1         | 7 | 3 | 11 | 5 | 7 | 5 | 5 | 7 |
| <i>Gossypium bickii</i> 1             | 7 | 3 | 11 | 5 | 7 | 5 | 5 | 7 |
| <i>Gossypium hirsutum</i> 14          | 7 | 3 | 11 | 5 | 7 | 5 | 5 | 7 |
| <i>Gossypium barbadense</i> 14        | 7 | 3 | 11 | 5 | 7 | 5 | 5 | 7 |
| <i>Gossypium populifolium</i> 1       | 7 | 3 | 11 | 5 | 7 | 5 | 5 | 7 |
| Leucine                               |   |   |    |   |   |   |   |   |
| <i>Gossypium arboreum</i> 50162       | 7 | 3 | 11 | 5 | 7 | 2 | 5 | 7 |
| <i>Gossypium arboreum</i> 129617      | 7 | 3 | 10 | 5 | 7 | 4 | 5 | 7 |
| <i>Gossypium arboreum</i> 98767       | 7 | 3 | 10 | 5 | 7 | 4 | 5 | 7 |
| <i>Gossypium arboreum</i> 150084      | 7 | 3 | 11 | 5 | 9 | 3 | 5 | 7 |
| <i>Gossypium anomalum</i> 128934      | 7 | 3 | 11 | 5 | 7 | 2 | 5 | 7 |
| <i>Gossypium anomalum</i> 98182       | 7 | 3 | 10 | 5 | 7 | 4 | 5 | 7 |
| <i>Gossypium anomalum</i> 49670       | 7 | 3 | 10 | 5 | 7 | 4 | 5 | 7 |
| <i>Gossypium anomalum</i> 149349      | 7 | 3 | 11 | 5 | 9 | 3 | 5 | 7 |
| <i>Gossypium robinsonii</i> 98555     | 7 | 3 | 11 | 5 | 7 | 2 | 5 | 7 |
| <i>Gossypium robinsonii</i> 49880     | 7 | 3 | 10 | 5 | 7 | 4 | 5 | 7 |
| <i>Gossypium robinsonii</i> 129376    | 7 | 3 | 10 | 5 | 7 | 4 | 5 | 7 |
| <i>Gossypium robinsonii</i> 149701    | 7 | 3 | 11 | 5 | 9 | 3 | 5 | 7 |
| <i>Gossypium klotzschianum</i> 149957 | 7 | 3 | 11 | 5 | 7 | 2 | 5 | 7 |
| <i>Gossypium klotzschianum</i> 129555 | 7 | 3 | 10 | 5 | 7 | 4 | 5 | 7 |
| <i>Gossypium klotzschianum</i> 50059  | 7 | 3 | 10 | 5 | 7 | 4 | 5 | 7 |
| <i>Gossypium klotzschianum</i> 98715  | 7 | 3 | 11 | 5 | 9 | 3 | 5 | 7 |
| <i>Gossypium somalense</i> 49761      | 7 | 3 | 11 | 5 | 7 | 2 | 5 | 7 |
| <i>Gossypium somalense</i> 98211      | 7 | 3 | 10 | 5 | 7 | 4 | 5 | 7 |
| <i>Gossypium somalense</i> 129020     | 7 | 3 | 10 | 5 | 7 | 4 | 5 | 7 |
| <i>Gossypium somalense</i> 149399     | 7 | 3 | 11 | 5 | 9 | 3 | 5 | 7 |
| <i>Gossypium longicalyx</i> 129626    | 7 | 3 | 11 | 5 | 7 | 2 | 5 | 7 |
| <i>Gossypium longicalyx</i> 50170     | 7 | 3 | 10 | 5 | 7 | 4 | 5 | 7 |
| <i>Gossypium longicalyx</i> 98733     | 7 | 3 | 10 | 5 | 7 | 4 | 5 | 7 |
| <i>Gossypium longicalyx</i> 150096    | 7 | 3 | 11 | 5 | 9 | 3 | 5 | 7 |
| <i>Gossypium bickii</i> 49547         | 7 | 3 | 11 | 5 | 7 | 2 | 5 | 7 |
| <i>Gossypium bickii</i> 128975        | 7 | 3 | 10 | 5 | 7 | 4 | 5 | 7 |
| <i>Gossypium bickii</i> 98144         | 7 | 3 | 10 | 5 | 7 | 4 | 5 | 7 |
| <i>Gossypium bickii</i> 149272        | 7 | 3 | 11 | 5 | 9 | 3 | 5 | 7 |
| <i>Gossypium hirsutum</i> 150134      | 7 | 3 | 11 | 5 | 7 | 2 | 5 | 7 |
| <i>Gossypium hirsutum</i> 50230       | 7 | 3 | 10 | 5 | 7 | 4 | 5 | 7 |
| <i>Gossypium hirsutum</i> 129681      | 7 | 3 | 10 | 5 | 7 | 4 | 5 | 7 |
| <i>Gossypium hirsutum</i> 98842       | 7 | 3 | 11 | 5 | 9 | 3 | 5 | 7 |
| <i>Gossypium barbadense</i> 98885     | 7 | 3 | 11 | 5 | 7 | 2 | 5 | 7 |
| <i>Gossypium barbadense</i> 129716    | 7 | 3 | 10 | 5 | 7 | 4 | 5 | 7 |
| <i>Gossypium barbadense</i> 50293     | 7 | 3 | 10 | 5 | 7 | 4 | 5 | 7 |
| <i>Gossypium barbadense</i> 150165    | 7 | 3 | 11 | 5 | 9 | 3 | 5 | 7 |
| <i>Gossypium populifolium</i> 129097  | 7 | 3 | 11 | 5 | 7 | 2 | 5 | 7 |
| <i>Gossypium populifolium</i> 98274   | 7 | 3 | 10 | 5 | 7 | 4 | 5 | 7 |
| <i>Gossypium populifolium</i> 49616   | 7 | 3 | 10 | 5 | 7 | 4 | 5 | 7 |

|                                      |   |   |    |   |   |   |   |   |
|--------------------------------------|---|---|----|---|---|---|---|---|
| <i>Gossypium populifolium</i> 149288 | 7 | 3 | 11 | 5 | 9 | 3 | 5 | 7 |
| Lysine                               |   |   |    |   |   |   |   |   |
| <i>Gossypium arboreum</i> 1805       | 7 | 4 | 7  | 4 | 7 | 6 | 5 | 7 |
| <i>Gossypium anomalum</i> 1837       | 7 | 4 | 7  | 4 | 7 | 6 | 5 | 7 |
| <i>Gossypium robinsonii</i> 1917     | 7 | 4 | 7  | 4 | 7 | 6 | 5 | 7 |
| <i>Gossypium klotzschianum</i> 1793  | 7 | 4 | 7  | 4 | 7 | 6 | 5 | 7 |
| <i>Gossypium somalense</i> 1786      | 7 | 4 | 7  | 4 | 7 | 6 | 5 | 7 |
| <i>Gossypium longicalyx</i> 1794     | 7 | 4 | 7  | 4 | 7 | 6 | 5 | 7 |
| <i>Gossypium bickii</i> 1805         | 7 | 4 | 7  | 4 | 7 | 6 | 5 | 7 |
| <i>Gossypium hirsutum</i> 1822       | 7 | 4 | 7  | 4 | 7 | 6 | 5 | 7 |
| <i>Gossypium barbadense</i> 1829     | 7 | 4 | 7  | 4 | 7 | 6 | 5 | 7 |
| <i>Gossypium populifolium</i> 1804   | 7 | 4 | 7  | 4 | 7 | 6 | 5 | 7 |
| Methionine                           |   |   |    |   |   |   |   |   |
| <i>Gossypium arboreum</i> 55499      | 6 | 4 | 9  | 5 | 7 | 5 | 5 | 7 |
| <i>Gossypium arboreum</i> 38806      | 6 | 4 | 9  | 5 | 7 | 5 | 5 | 7 |
| <i>Gossypium anomalum</i> 54918      | 7 | 4 | 8  | 5 | 7 | 5 | 5 | 7 |
| <i>Gossypium anomalum</i> 38389      | 6 | 4 | 9  | 5 | 7 | 5 | 5 | 7 |
| <i>Gossypium robinsonii</i> 55185    | 6 | 4 | 9  | 5 | 7 | 5 | 5 | 7 |
| <i>Gossypium robinsonii</i> 38563    | 7 | 4 | 8  | 5 | 7 | 5 | 5 | 7 |
| <i>Gossypium klotzschianum</i> 38728 | 7 | 4 | 8  | 5 | 7 | 5 | 5 | 7 |
| <i>Gossypium klotzschianum</i> 55396 | 6 | 4 | 9  | 5 | 7 | 5 | 5 | 7 |
| <i>Gossypium somalense</i> 38486     | 6 | 4 | 9  | 5 | 7 | 5 | 5 | 7 |
| <i>Gossypium somalense</i> 54981     | 7 | 4 | 8  | 5 | 7 | 5 | 5 | 7 |
| <i>Gossypium longicalyx</i> 55474    | 6 | 4 | 9  | 5 | 7 | 5 | 5 | 7 |
| <i>Gossypium longicalyx</i> 38827    | 7 | 4 | 8  | 5 | 7 | 5 | 5 | 7 |
| <i>Gossypium bickii</i> 54819        | 7 | 4 | 8  | 5 | 7 | 5 | 5 | 7 |
| <i>Gossypium hirsutum</i> 55555      | 7 | 4 | 8  | 5 | 7 | 5 | 5 | 7 |
| <i>Gossypium hirsutum</i> 38878      | 6 | 4 | 9  | 5 | 7 | 5 | 5 | 7 |
| <i>Gossypium barbadense</i> 38918    | 7 | 4 | 8  | 5 | 7 | 5 | 5 | 7 |
| <i>Gossypium barbadense</i> 55630    | 6 | 4 | 9  | 5 | 7 | 5 | 5 | 7 |
| <i>Gossypium populifolium</i> 38208  | 6 | 4 | 9  | 5 | 7 | 5 | 5 | 7 |
| <i>Gossypium populifolium</i> 54841  | 7 | 4 | 8  | 5 | 7 | 5 | 5 | 7 |
| Phenylalanine                        |   |   |    |   |   |   |   |   |
| <i>Gossypium arboreum</i> 51228      | 7 | 4 | 8  | 5 | 7 | 5 | 5 | 7 |
| <i>Gossypium anomalum</i> 50736      | 7 | 4 | 8  | 5 | 7 | 5 | 5 | 7 |
| <i>Gossypium robinsonii</i> 50938    | 7 | 4 | 8  | 5 | 7 | 5 | 5 | 7 |
| <i>Gossypium klotzschianum</i> 51132 | 7 | 4 | 8  | 5 | 7 | 5 | 5 | 7 |
| <i>Gossypium somalense</i> 50793     | 7 | 4 | 8  | 5 | 7 | 5 | 5 | 7 |
| <i>Gossypium longicalyx</i> 51235    | 7 | 4 | 8  | 5 | 7 | 5 | 5 | 7 |
| <i>Gossypium bickii</i> 50602        | 7 | 4 | 8  | 5 | 7 | 5 | 5 | 7 |
| <i>Gossypium hirsutum</i> 51235      | 7 | 4 | 8  | 5 | 7 | 5 | 5 | 7 |
| <i>Gossypium barbadense</i> 51357    | 7 | 4 | 8  | 5 | 7 | 5 | 5 | 7 |
| <i>Gossypium populifolium</i> 50672  | 7 | 4 | 8  | 5 | 7 | 5 | 5 | 7 |
| Proline                              |   |   |    |   |   |   |   |   |
| <i>Gossypium arboreum</i> 70580      | 7 | 4 | 9  | 5 | 7 | 5 | 5 | 7 |
| <i>Gossypium anomalum</i> 70026      | 7 | 4 | 9  | 5 | 7 | 5 | 5 | 7 |
| <i>Gossypium robinsonii</i> 70242    | 7 | 4 | 9  | 5 | 7 | 5 | 5 | 7 |
| <i>Gossypium klotzschianum</i> 70508 | 7 | 4 | 9  | 5 | 7 | 5 | 5 | 7 |
| <i>Gossypium somalense</i> 70023     | 7 | 4 | 9  | 5 | 7 | 5 | 5 | 7 |

|                                      |   |   |    |   |   |   |   |   |
|--------------------------------------|---|---|----|---|---|---|---|---|
| <i>Gossypium longicalyx</i> 70517    | 7 | 4 | 9  | 5 | 7 | 5 | 5 | 7 |
| <i>Gossypium bickii</i> 70000        | 7 | 4 | 9  | 5 | 7 | 5 | 5 | 7 |
| <i>Gossypium hirsutum</i> 70646      | 7 | 4 | 9  | 5 | 7 | 5 | 5 | 7 |
| <i>Gossypium barbadense</i> 70697    | 7 | 4 | 9  | 5 | 7 | 5 | 5 | 7 |
| <i>Gossypium populifolium</i> 69975  | 7 | 4 | 9  | 5 | 7 | 5 | 5 | 7 |
| Serine                               |   |   |    |   |   |   |   |   |
| <i>Gossypium arboreum</i> 47238      | 7 | 3 | 11 | 5 | 7 | 4 | 5 | 7 |
| <i>Gossypium arboreum</i> 37152      | 7 | 4 | 9  | 5 | 7 | 8 | 5 | 7 |
| <i>Gossypium arboreum</i> 8172       | 7 | 3 | 11 | 4 | 7 | 3 | 5 | 7 |
| <i>Gossypium anomalum</i> 46783      | 7 | 3 | 11 | 5 | 7 | 4 | 5 | 7 |
| <i>Gossypium anomalum</i> 36834      | 7 | 4 | 9  | 5 | 7 | 8 | 5 | 7 |
| <i>Gossypium anomalum</i> 8187       | 7 | 3 | 11 | 4 | 7 | 3 | 5 | 7 |
| <i>Gossypium robinsonii</i> 46934    | 7 | 3 | 11 | 5 | 7 | 4 | 5 | 7 |
| <i>Gossypium robinsonii</i> 36973    | 7 | 4 | 9  | 5 | 7 | 8 | 5 | 7 |
| <i>Gossypium robinsonii</i> 8301     | 7 | 3 | 11 | 4 | 7 | 3 | 5 | 7 |
| <i>Gossypium klotzschianum</i> 47127 | 7 | 3 | 11 | 5 | 7 | 4 | 5 | 7 |
| <i>Gossypium klotzschianum</i> 37101 | 7 | 4 | 9  | 5 | 7 | 8 | 5 | 7 |
| <i>Gossypium klotzschianum</i> 8125  | 7 | 3 | 11 | 4 | 7 | 3 | 5 | 7 |
| <i>Gossypium somalense</i> 46866     | 7 | 3 | 11 | 5 | 7 | 4 | 5 | 7 |
| <i>Gossypium somalense</i> 36958     | 7 | 4 | 9  | 5 | 7 | 8 | 5 | 7 |
| <i>Gossypium somalense</i> 8143      | 7 | 3 | 11 | 4 | 7 | 3 | 5 | 7 |
| <i>Gossypium longicalyx</i> 47246    | 7 | 3 | 11 | 5 | 7 | 4 | 5 | 7 |
| <i>Gossypium longicalyx</i> 37232    | 7 | 4 | 9  | 5 | 7 | 8 | 5 | 7 |
| <i>Gossypium longicalyx</i> 8158     | 7 | 3 | 11 | 4 | 7 | 3 | 5 | 7 |
| <i>Gossypium bickii</i> 46708        | 7 | 3 | 11 | 5 | 7 | 4 | 5 | 7 |
| <i>Gossypium bickii</i> 36776        | 7 | 4 | 9  | 5 | 7 | 8 | 5 | 7 |
| <i>Gossypium bickii</i> 8092         | 7 | 3 | 11 | 4 | 7 | 3 | 5 | 7 |
| <i>Gossypium hirsutum</i> 47306      | 7 | 3 | 11 | 5 | 7 | 4 | 5 | 7 |
| <i>Gossypium hirsutum</i> 37283      | 7 | 4 | 9  | 5 | 7 | 8 | 5 | 7 |
| <i>Gossypium hirsutum</i> 8180       | 7 | 3 | 11 | 4 | 7 | 3 | 5 | 7 |
| <i>Gossypium barbadense</i> 47350    | 7 | 3 | 11 | 5 | 7 | 4 | 5 | 7 |
| <i>Gossypium barbadense</i> 37214    | 7 | 4 | 9  | 5 | 7 | 8 | 5 | 7 |
| <i>Gossypium barbadense</i> 8191     | 7 | 3 | 11 | 4 | 7 | 3 | 5 | 7 |
| <i>Gossypium populifolium</i> 46650  | 7 | 3 | 11 | 5 | 7 | 4 | 5 | 7 |
| <i>Gossypium populifolium</i> 36711  | 7 | 4 | 9  | 5 | 7 | 8 | 5 | 7 |
| <i>Gossypium populifolium</i> 8166   | 7 | 3 | 11 | 4 | 7 | 3 | 5 | 7 |
| Threonine                            |   |   |    |   |   |   |   |   |
| <i>Gossypium arboreum</i> 48757      | 7 | 4 | 8  | 5 | 7 | 5 | 5 | 7 |
| <i>Gossypium arboreum</i> 32974      | 7 | 4 | 7  | 5 | 7 | 5 | 5 | 7 |
| <i>Gossypium anomalum</i> 48265      | 7 | 4 | 8  | 5 | 7 | 5 | 5 | 7 |
| <i>Gossypium anomalum</i> 32659      | 7 | 4 | 7  | 5 | 7 | 5 | 5 | 7 |
| <i>Gossypium robinsonii</i> 48427    | 7 | 4 | 8  | 5 | 7 | 5 | 5 | 7 |
| <i>Gossypium robinsonii</i> 32783    | 7 | 4 | 7  | 5 | 7 | 5 | 5 | 7 |
| <i>Gossypium klotzschianum</i> 48640 | 7 | 4 | 8  | 5 | 7 | 5 | 5 | 7 |
| <i>Gossypium klotzschianum</i> 32916 | 7 | 4 | 7  | 5 | 7 | 5 | 5 | 7 |
| <i>Gossypium somalense</i> 48360     | 7 | 4 | 8  | 5 | 7 | 5 | 5 | 7 |
| <i>Gossypium somalense</i> 32785     | 7 | 4 | 7  | 5 | 7 | 5 | 5 | 7 |
| <i>Gossypium longicalyx</i> 48749    | 7 | 4 | 8  | 5 | 7 | 5 | 5 | 7 |
| <i>Gossypium longicalyx</i> 33039    | 7 | 4 | 7  | 5 | 7 | 5 | 5 | 7 |

|                                       |   |   |    |   |   |   |   |   |
|---------------------------------------|---|---|----|---|---|---|---|---|
| <i>Gossypium bickii</i> 48169         | 7 | 4 | 8  | 5 | 7 | 5 | 5 | 7 |
| <i>Gossypium bickii</i> 32595         | 7 | 4 | 7  | 5 | 7 | 5 | 5 | 7 |
| <i>Gossypium hirsutum</i> 48828       | 7 | 4 | 8  | 5 | 7 | 5 | 5 | 7 |
| <i>Gossypium hirsutum</i> 33077       | 7 | 4 | 7  | 5 | 7 | 5 | 5 | 7 |
| <i>Gossypium barbadense</i> 48869     | 7 | 4 | 8  | 5 | 7 | 5 | 5 | 7 |
| <i>Gossypium barbadense</i> 33022     | 7 | 4 | 7  | 5 | 7 | 5 | 5 | 7 |
| <i>Gossypium populifolium</i> 48155   | 7 | 4 | 8  | 5 | 7 | 5 | 5 | 7 |
| <i>Gossypium populifolium</i> 32528   | 7 | 4 | 7  | 5 | 7 | 5 | 5 | 7 |
| Isoleucine                            |   |   |    |   |   |   |   |   |
| <i>Gossypium arboreum</i> 158107      | 7 | 3 | 10 | 5 | 7 | 5 | 5 | 7 |
| <i>Gossypium arboreum</i> 140539      | 7 | 4 | 7  | 5 | 7 | 5 | 5 | 7 |
| <i>Gossypium arboreum</i> 107362      | 7 | 4 | 7  | 5 | 7 | 5 | 5 | 7 |
| <i>Gossypium arboreum</i> 90751       | 7 | 3 | 10 | 5 | 7 | 5 | 5 | 7 |
| <i>Gossypium anomalum</i> 157384      | 7 | 3 | 10 | 5 | 7 | 5 | 5 | 7 |
| <i>Gossypium anomalum</i> 139818      | 7 | 4 | 7  | 5 | 7 | 5 | 5 | 7 |
| <i>Gossypium anomalum</i> 106764      | 7 | 4 | 7  | 5 | 7 | 5 | 5 | 7 |
| <i>Gossypium anomalum</i> 90154       | 7 | 3 | 10 | 5 | 7 | 5 | 5 | 7 |
| <i>Gossypium robinsonii</i> 157725    | 7 | 3 | 10 | 5 | 7 | 5 | 5 | 7 |
| <i>Gossypium robinsonii</i> 140193    | 7 | 4 | 7  | 5 | 7 | 5 | 5 | 7 |
| <i>Gossypium robinsonii</i> 107114    | 7 | 4 | 7  | 5 | 7 | 5 | 5 | 7 |
| <i>Gossypium robinsonii</i> 90538     | 7 | 3 | 10 | 5 | 7 | 5 | 5 | 7 |
| <i>Gossypium klotzschianum</i> 157975 | 7 | 3 | 10 | 5 | 7 | 5 | 5 | 7 |
| <i>Gossypium klotzschianum</i> 140417 | 7 | 4 | 7  | 5 | 7 | 5 | 5 | 7 |
| <i>Gossypium klotzschianum</i> 107306 | 7 | 4 | 7  | 5 | 7 | 5 | 5 | 7 |
| <i>Gossypium klotzschianum</i> 90704  | 7 | 3 | 10 | 5 | 7 | 5 | 5 | 7 |
| <i>Gossypium somalense</i> 157415     | 7 | 3 | 10 | 5 | 7 | 5 | 5 | 7 |
| <i>Gossypium somalense</i> 139880     | 7 | 4 | 7  | 5 | 7 | 5 | 5 | 7 |
| <i>Gossypium somalense</i> 106781     | 7 | 4 | 7  | 5 | 7 | 5 | 5 | 7 |
| <i>Gossypium somalense</i> 90202      | 7 | 3 | 10 | 5 | 7 | 5 | 5 | 7 |
| <i>Gossypium longicalyx</i> 158119    | 7 | 3 | 10 | 5 | 7 | 5 | 5 | 7 |
| <i>Gossypium longicalyx</i> 140553    | 7 | 4 | 7  | 5 | 7 | 5 | 5 | 7 |
| <i>Gossypium longicalyx</i> 107326    | 7 | 4 | 7  | 5 | 7 | 5 | 5 | 7 |
| <i>Gossypium longicalyx</i> 90717     | 7 | 3 | 10 | 5 | 7 | 5 | 5 | 7 |
| <i>Gossypium bickii</i> 157295        | 7 | 3 | 10 | 5 | 7 | 5 | 5 | 7 |
| <i>Gossypium bickii</i> 139763        | 7 | 4 | 7  | 5 | 7 | 5 | 5 | 7 |
| <i>Gossypium bickii</i> 106704        | 7 | 4 | 7  | 5 | 7 | 5 | 5 | 7 |
| <i>Gossypium bickii</i> 90128         | 7 | 3 | 10 | 5 | 7 | 5 | 5 | 7 |
| <i>Gossypium hirsutum</i> 158157      | 7 | 3 | 10 | 5 | 7 | 5 | 5 | 7 |
| <i>Gossypium hirsutum</i> 140600      | 7 | 4 | 7  | 5 | 7 | 5 | 5 | 7 |
| <i>Gossypium hirsutum</i> 107426      | 7 | 4 | 7  | 5 | 7 | 5 | 5 | 7 |
| <i>Gossypium hirsutum</i> 90826       | 7 | 3 | 10 | 5 | 7 | 5 | 5 | 7 |
| <i>Gossypium barbadense</i> 158188    | 7 | 3 | 10 | 5 | 7 | 5 | 5 | 7 |
| <i>Gossypium barbadense</i> 140630    | 7 | 4 | 7  | 5 | 7 | 5 | 5 | 7 |
| <i>Gossypium barbadense</i> 107470    | 7 | 4 | 7  | 5 | 7 | 5 | 5 | 7 |
| <i>Gossypium barbadense</i> 90869     | 7 | 3 | 10 | 5 | 7 | 5 | 5 | 7 |
| <i>Gossypium populifolium</i> 157311  | 7 | 3 | 10 | 5 | 7 | 5 | 5 | 7 |
| <i>Gossypium populifolium</i> 139789  | 7 | 4 | 7  | 5 | 7 | 5 | 5 | 7 |
| <i>Gossypium populifolium</i> 106824  | 7 | 4 | 7  | 5 | 7 | 5 | 5 | 7 |
| <i>Gossypium populifolium</i> 90258   | 7 | 3 | 10 | 5 | 7 | 5 | 5 | 7 |

| Tryptophan                            |   |   |   |   |   |   |   |   |
|---------------------------------------|---|---|---|---|---|---|---|---|
| <i>Gossypium arboreum</i> 70328       | 7 | 4 | 9 | 5 | 7 | 5 | 5 | 7 |
| <i>Gossypium anomalum</i> 69776       | 7 | 4 | 9 | 5 | 7 | 5 | 5 | 7 |
| <i>Gossypium robinsonii</i> 69976     | 7 | 4 | 9 | 5 | 7 | 5 | 5 | 7 |
| <i>Gossypium klotzschianum</i> 70251  | 7 | 4 | 9 | 5 | 7 | 5 | 5 | 7 |
| <i>Gossypium somalense</i> 69766      | 7 | 4 | 9 | 5 | 7 | 5 | 5 | 7 |
| <i>Gossypium longicalyx</i> 70261     | 7 | 4 | 9 | 5 | 7 | 5 | 5 | 7 |
| <i>Gossypium bickii</i> 69734         | 7 | 4 | 9 | 5 | 7 | 5 | 5 | 7 |
| <i>Gossypium hirsutum</i> 70394       | 7 | 4 | 9 | 5 | 7 | 5 | 5 | 7 |
| <i>Gossypium barbadense</i> 70447     | 7 | 4 | 9 | 5 | 7 | 5 | 5 | 7 |
| <i>Gossypium populifolium</i> 69709   | 7 | 4 | 9 | 5 | 7 | 5 | 5 | 7 |
| Tyrosine                              |   |   |   |   |   |   |   |   |
| <i>Gossypium arboreum</i> 31942       | 7 | 4 | 9 | 5 | 7 | 3 | 5 | 7 |
| <i>Gossypium anomalum</i> 31861       | 7 | 4 | 9 | 5 | 7 | 3 | 5 | 7 |
| <i>Gossypium robinsonii</i> 31755     | 7 | 4 | 9 | 5 | 7 | 3 | 5 | 7 |
| <i>Gossypium klotzschianum</i> 31887  | 7 | 4 | 9 | 5 | 7 | 3 | 5 | 7 |
| <i>Gossypium somalense</i> 31771      | 7 | 4 | 9 | 5 | 7 | 3 | 5 | 7 |
| <i>Gossypium longicalyx</i> 31974     | 7 | 4 | 9 | 5 | 7 | 3 | 5 | 7 |
| <i>Gossypium bickii</i> 31536         | 7 | 4 | 9 | 5 | 7 | 3 | 5 | 7 |
| <i>Gossypium hirsutum</i> 32016       | 7 | 4 | 9 | 5 | 7 | 3 | 5 | 7 |
| <i>Gossypium barbadense</i> 31965     | 7 | 4 | 9 | 5 | 7 | 3 | 5 | 7 |
| <i>Gossypium populifolium</i> 31498   | 7 | 4 | 9 | 5 | 7 | 3 | 5 | 7 |
| Valine                                |   |   |   |   |   |   |   |   |
| <i>Gossypium arboreum</i> 143580      | 7 | 4 | 7 | 5 | 7 | 5 | 5 | 7 |
| <i>Gossypium arboreum</i> 105280      | 7 | 4 | 7 | 4 | 7 | 6 | 5 | 7 |
| <i>Gossypium arboreum</i> 54622       | 7 | 4 | 8 | 4 | 7 | 6 | 5 | 7 |
| <i>Gossypium anomalum</i> 142858      | 7 | 4 | 7 | 5 | 7 | 5 | 5 | 7 |
| <i>Gossypium anomalum</i> 104682      | 7 | 4 | 7 | 4 | 7 | 6 | 5 | 7 |
| <i>Gossypium anomalum</i> 54048       | 7 | 4 | 8 | 4 | 7 | 6 | 5 | 7 |
| <i>Gossypium robinsonii</i> 143238    | 7 | 4 | 7 | 5 | 7 | 5 | 5 | 7 |
| <i>Gossypium robinsonii</i> 105027    | 7 | 4 | 7 | 4 | 7 | 6 | 5 | 7 |
| <i>Gossypium robinsonii</i> 54308     | 7 | 4 | 8 | 4 | 7 | 6 | 5 | 7 |
| <i>Gossypium klotzschianum</i> 143238 | 7 | 4 | 7 | 5 | 7 | 5 | 5 | 7 |
| <i>Gossypium klotzschianum</i> 105224 | 7 | 4 | 7 | 4 | 7 | 6 | 5 | 7 |
| <i>Gossypium klotzschianum</i> 54519  | 7 | 4 | 8 | 4 | 7 | 6 | 5 | 7 |
| <i>Gossypium somalense</i> 142920     | 7 | 4 | 7 | 5 | 7 | 5 | 5 | 7 |
| <i>Gossypium somalense</i> 104699     | 7 | 4 | 7 | 4 | 7 | 6 | 5 | 7 |
| <i>Gossypium somalense</i> 54104      | 7 | 4 | 8 | 4 | 7 | 6 | 5 | 7 |
| <i>Gossypium longicalyx</i> 143595    | 7 | 4 | 7 | 5 | 7 | 5 | 5 | 7 |
| <i>Gossypium longicalyx</i> 105243    | 7 | 4 | 7 | 4 | 7 | 6 | 5 | 7 |
| <i>Gossypium longicalyx</i> 54597     | 7 | 4 | 8 | 4 | 7 | 6 | 5 | 7 |
| <i>Gossypium bickii</i> 142803        | 7 | 4 | 7 | 5 | 7 | 5 | 5 | 7 |
| <i>Gossypium bickii</i> 142803        | 7 | 4 | 7 | 4 | 7 | 6 | 5 | 7 |
| <i>Gossypium bickii</i> 53945         | 7 | 4 | 8 | 4 | 7 | 6 | 5 | 7 |
| <i>Gossypium hirsutum</i> 143641      | 7 | 4 | 7 | 5 | 7 | 5 | 5 | 7 |
| <i>Gossypium hirsutum</i> 105344      | 7 | 4 | 7 | 4 | 7 | 6 | 5 | 7 |
| <i>Gossypium hirsutum</i> 54678       | 7 | 4 | 8 | 4 | 7 | 6 | 5 | 7 |
| <i>Gossypium barbadense</i> 143671    | 7 | 4 | 7 | 5 | 7 | 5 | 5 | 7 |
| <i>Gossypium barbadense</i> 105388    | 7 | 4 | 7 | 4 | 7 | 6 | 5 | 7 |



|                                       |   |   |   |   |   |   |   |   |
|---------------------------------------|---|---|---|---|---|---|---|---|
| <i>Gossypium barbadense</i> _54753    | 7 | 4 | 8 | 4 | 7 | 6 | 5 | 7 |
| <i>Gossypium populifolium</i> _142829 | 7 | 4 | 7 | 5 | 7 | 5 | 5 | 7 |
| <i>Gossypium populifolium</i> _104742 | 7 | 4 | 7 | 4 | 7 | 6 | 5 | 7 |
| <i>Gossypium populifolium</i> _53966  | 7 | 4 | 8 | 4 | 7 | 6 | 5 | 7 |
