# Supplementary material for: Novel Structural Variation and Evolutionary Characteristics of Chloroplast tRNA in Gossypium Plants
Source: MDPI journal article supplement (doi:10.3390/genes12060822), 2021-05-27
Supplement: s1 [file s1]

Table S1 Information registration of the analyzed tRNA genes

| Species             | Name          | Minimum | Maximum | Length |
|---------------------|---------------|---------|---------|--------|
| <i>G. arboretum</i> | trnI-CAU tRNA | 158,107 | 158,180 | 74     |
|                     | trnL-CAA tRNA | 150,084 | 150,164 | 81     |
|                     | trnV-GAC tRNA | 143,580 | 143,651 | 72     |
|                     | trnI-GAU tRNA | 140,539 | 141,569 | 77     |
|                     | trnA-UGC tRNA | 139,606 | 140,475 | 73     |
|                     | trnR-ACG tRNA | 135,702 | 135,775 | 74     |
|                     | trnN-GUU tRNA | 134,999 | 135,070 | 72     |
|                     | trnL-UAG tRNA | 129,617 | 129,696 | 80     |
|                     | trnN-GUU tRNA | 113,861 | 113,932 | 72     |
|                     | trnR-ACG tRNA | 113,156 | 113,229 | 74     |
|                     | trnA-UGC tRNA | 108,456 | 109,325 | 73     |
|                     | trnI-GAU tRNA | 107,362 | 108,392 | 77     |
|                     | trnV-GAC tRNA | 105,280 | 105,351 | 72     |
|                     | trnL-CAA tRNA | 98,767  | 98,847  | 81     |
|                     | trnI-CAU tRNA | 90,751  | 90,824  | 74     |
|                     | trnP-UGG tRNA | 70,580  | 70,653  | 74     |
|                     | trnW-CCA tRNA | 70,328  | 70,400  | 73     |
|                     | trnM-CAU tRNA | 55,499  | 55,570  | 72     |
|                     | trnV-UAC tRNA | 54,622  | 55,303  | 85     |
|                     | trnF-GAA tRNA | 51,228  | 51,300  | 73     |
|                     | trnL-UAA tRNA | 50,162  | 50,831  | 87     |
|                     | trnT-UGU tRNA | 48,757  | 48,829  | 73     |
|                     | trnS-GGA tRNA | 47,238  | 47,324  | 87     |
|                     | trnM-CAU tRNA | 38,806  | 38,879  | 74     |
|                     | trnG-GCC tRNA | 38,583  | 38,653  | 71     |
|                     | trnS-UGA tRNA | 37,152  | 37,244  | 93     |
|                     | trnT-GGU tRNA | 32,974  | 33,045  | 72     |
|                     | trnE-UUC tRNA | 32,085  | 32,157  | 73     |
|                     | trnY-GUA tRNA | 31,942  | 32,025  | 84     |
|                     | trnD-GUC tRNA | 31,366  | 31,439  | 74     |
|                     | trnC-GCA tRNA | 28,868  | 28,948  | 81     |
|                     | trnR-UCU tRNA | 10,181  | 10,252  | 72     |
|                     | trnG-GCC tRNA | 9,147   | 9,975   | 60     |
|                     | trnS-GCU tRNA | 8,172   | 8,259   | 88     |
|                     | trnQ-UUG tRNA | 6,969   | 7,040   | 72     |
|                     | trnK-UUU tRNA | 1,805   | 4,410   | 72     |
|                     | trnH-GUG tRNA | 3       | 77      | 75     |
| <i>G. anomalum</i>  | trnI-CAU tRNA | 157,384 | 157,457 | 74     |
|                     | trnL-CAA tRNA | 149,349 | 149,429 | 81     |

|                      |               |         |         |    |
|----------------------|---------------|---------|---------|----|
|                      | trnV-GAC tRNA | 142,858 | 142,929 | 72 |
|                      | trnI-GAU tRNA | 139,818 | 140,847 | 77 |
|                      | trnA-UGC      | 138,885 | 139,754 | 73 |
|                      | trnR-ACG tRNA | 134,998 | 135,071 | 74 |
|                      | trnN-GUU tRNA | 134,300 | 134,371 | 72 |
|                      | trnL-UAG tRNA | 128,934 | 129,013 | 80 |
|                      | trnN-GUU tRNA | 113,240 | 113,311 | 72 |
|                      | trnR-ACG tRNA | 112,540 | 112,613 | 74 |
|                      | trnA-UGC      | 107,857 | 108,726 | 73 |
|                      | trnI-GAU tRNA | 106,764 | 107,793 | 76 |
|                      | trnV-GAC tRNA | 104,682 | 104,753 | 72 |
|                      | trnL-CAA tRNA | 98,182  | 98,262  | 81 |
|                      | trnI-CAU tRNA | 90,154  | 90,227  | 74 |
|                      | trnP-UGG tRNA | 70,026  | 70,099  | 74 |
|                      | trnW-CCA tRNA | 69,776  | 69,848  | 73 |
|                      | trnM-CAU tRNA | 54,918  | 54,990  | 73 |
|                      | trnV-UAC tRNA | 54,048  | 54,723  | 76 |
|                      | trnF-GAA tRNA | 50,736  | 50,808  | 73 |
|                      | trnL-UAA tRNA | 49,670  | 50,331  | 87 |
|                      | trnT-UGU tRNA | 48,265  | 48,337  | 73 |
|                      | trnS-GGA tRNA | 46,783  | 46,869  | 87 |
|                      | trnM-CAU tRNA | 38,389  | 38,462  | 74 |
|                      | trnG-GCC tRNA | 38,166  | 38,236  | 71 |
|                      | trnS-UGA tRNA | 36,834  | 36,926  | 93 |
|                      | trnT-GGU tRNA | 32,659  | 32,730  | 72 |
|                      | trnE-UUC tRNA | 32,004  | 32,076  | 73 |
|                      | trnY-GUA tRNA | 31,861  | 31,944  | 84 |
|                      | trnD-GUC tRNA | 31,290  | 31,363  | 74 |
|                      | trnC-GCA tRNA | 28,806  | 28,886  | 81 |
|                      | trnR-UCU tRNA | 10,186  | 10,257  | 72 |
|                      | trnG-UCC tRNA | 9,156   | 9,995   | 80 |
|                      | trnS-GCU tRNA | 8,187   | 8,274   | 88 |
|                      | trnQ-UUG tRNA | 6,980   | 7,051   | 72 |
|                      | trnK-UUU tRNA | 1,837   | 4,443   | 72 |
|                      | trnH-GUG tRNA | 23      | 97      | 75 |
| <i>G. robinsonii</i> | trnI-CAU tRNA | 157,725 | 157,798 | 74 |
|                      | trnL-CAA tRNA | 149,701 | 149,781 | 81 |
|                      | trnV-GAC tRNA | 143,238 | 143,309 | 72 |
|                      | trnI-GAU tRNA | 140,193 | 141,222 | 77 |
|                      | trnA-UGC      | 139,260 | 140,129 | 73 |
|                      | trnR-ACG tRNA | 135,368 | 135,441 | 74 |
|                      | trnN-GUU tRNA | 134,665 | 134,736 | 72 |
|                      | trnL-UAG tRNA | 129,376 | 129,455 | 80 |

|                         |               |         |         |    |
|-------------------------|---------------|---------|---------|----|
|                         | trnN-GUU tRNA | 113,600 | 113,671 | 72 |
|                         | trnR-ACG tRNA | 112,895 | 112,968 | 74 |
|                         | trnA-UGC      | 108,207 | 109,076 | 73 |
|                         | trnI-GAU tRNA | 107,114 | 108,143 | 77 |
|                         | trnV-GAC tRNA | 105,027 | 105,098 | 72 |
|                         | trnL-CAA tRNA | 98,555  | 98,635  | 81 |
|                         | trnI-CAU tRNA | 90,538  | 90,611  | 74 |
|                         | trnP-UGG tRNA | 70,242  | 70,315  | 74 |
|                         | trnW-CCA tRNA | 69,976  | 70,048  | 73 |
|                         | trnM-CAU tRNA | 55,185  | 55,256  | 72 |
|                         | trnV-UAC tRNA | 54,308  | 54,989  | 75 |
|                         | trnF-GAA tRNA | 50,938  | 51,010  | 73 |
|                         | trnL-UAA tRNA | 49,880  | 50,539  | 89 |
|                         | trnT-UGU tRNA | 48,427  | 48,499  | 73 |
|                         | trnS-GGA tRNA | 46,934  | 47,020  | 87 |
|                         | trnM-CAU tRNA | 38,563  | 38,636  | 74 |
|                         | trnG-GCC tRNA | 38,341  | 38,411  | 71 |
|                         | trnS-UGA tRNA | 36,973  | 37,065  | 93 |
|                         | trnT-GGU tRNA | 32,783  | 32,854  | 72 |
|                         | trnE-UUC tRNA | 31,898  | 31,970  | 73 |
|                         | trnY-GUA tRNA | 31,755  | 31,838  | 84 |
|                         | trnD-GUC tRNA | 31,179  | 31,252  | 74 |
|                         | trnC-GCA tRNA | 28,954  | 29,034  | 81 |
|                         | trnR-UCU tRNA | 10,304  | 10,375  | 72 |
|                         | trnG-GCC tRNA | 9,259   | 10,099  | 71 |
|                         | trnS-GCU tRNA | 8,301   | 8,388   | 88 |
|                         | trnQ-UUG tRNA | 7,083   | 7,154   | 72 |
|                         | trnK-UUU tRNA | 1,917   | 4,537   | 72 |
|                         | trnH-GUG tRNA | 122     | 196     | 75 |
| <i>G. klotzschianum</i> | trnI-CAU tRNA | 157,975 | 158,048 | 74 |
|                         | trnL-CAA tRNA | 149,957 | 150,037 | 81 |
|                         | trnV-GAC tRNA | 143,457 | 143,528 | 72 |
|                         | trnI-GAU tRNA | 140,417 | 141,446 | 77 |
|                         | trnA-UGC      | 139,484 | 140,353 | 73 |
|                         | trnR-ACG tRNA | 135,587 | 135,660 | 74 |
|                         | trnN-GUU tRNA | 134,889 | 134,960 | 72 |
|                         | trnL-UAG tRNA | 129,555 | 129,634 | 80 |
|                         | trnN-GUU tRNA | 113,792 | 113,863 | 72 |
|                         | trnR-ACG tRNA | 113,092 | 113,165 | 74 |
|                         | trnA-UGC      | 108,399 | 109,268 | 73 |
|                         | trnI-GAU tRNA | 107,306 | 108,335 | 77 |
|                         | trnV-GAC tRNA | 105,224 | 105,295 | 72 |
|                         | trnL-CAA tRNA | 98,715  | 98,795  | 81 |

|                     |               |         |         |    |
|---------------------|---------------|---------|---------|----|
|                     | trnI-CAU tRNA | 90,704  | 90,777  | 74 |
|                     | trnP-UGG tRNA | 70,508  | 70,581  | 74 |
|                     | trnW-CCA tRNA | 70,251  | 70,323  | 73 |
|                     | trnM-CAU tRNA | 55,396  | 55,467  | 72 |
|                     | trnV-UAC tRNA | 54,519  | 55,200  | 75 |
|                     | trnF-GAA tRNA | 51,132  | 51,204  | 73 |
|                     | trnL-UAA tRNA | 50,059  | 50,724  | 87 |
|                     | trnT-UGU tRNA | 48,640  | 48,712  | 73 |
|                     | trnS-GGA tRNA | 47,127  | 47,213  | 87 |
|                     | trnM-CAU tRNA | 38,728  | 38,801  | 74 |
|                     | tRNA-Gly      | 38,505  | 38,575  | 71 |
|                     | trnS-UGA tRNA | 37,101  | 37,193  | 93 |
|                     | trnT-GGU tRNA | 32,916  | 32,987  | 72 |
|                     | trnE-UUC tRNA | 32,030  | 32,102  | 73 |
|                     | trnY-GUA tRNA | 31,887  | 31,970  | 84 |
|                     | trnD-GUC tRNA | 31,310  | 31,383  | 74 |
|                     | trnC-GCA tRNA | 28,812  | 28,892  | 81 |
|                     | trnR-UCU tRNA | 10,146  | 10,217  | 72 |
|                     | trnG-GCC tRNA | 9,103   | 9,948   | 68 |
|                     | trnS-GCU tRNA | 8,125   | 8,212   | 88 |
|                     | trnQ-UUG tRNA | 6,917   | 6,988   | 72 |
|                     | trnK-UUU tRNA | 1,793   | 4,354   | 73 |
|                     | trnH-GUG tRNA | 1       | 74      | 74 |
| <i>G. somalense</i> | trnI-CAU tRNA | 157,415 | 157,488 | 74 |
|                     | trnL-CAA tRNA | 149,399 | 149,479 | 81 |
|                     | trnV-GAC tRNA | 142,920 | 142,991 | 72 |
|                     | trnI-GAU tRNA | 139,880 | 140,909 | 77 |
|                     | trnA-UGC      | 138,947 | 139,816 | 73 |
|                     | trnR-ACG tRNA | 135,065 | 135,138 | 74 |
|                     | trnN-GUU tRNA | 134,367 | 134,438 | 72 |
|                     | trnL-UAG tRNA | 129,020 | 129,099 | 80 |
|                     | trnN-GUU tRNA | 113,252 | 113,323 | 72 |
|                     | trnR-ACG tRNA | 112,552 | 112,625 | 74 |
|                     | trnA-UGC      | 107,874 | 108,743 | 73 |
|                     | trnI-GAU tRNA | 106,781 | 107,810 | 77 |
|                     | trnV-GAC tRNA | 104,699 | 104,770 | 72 |
|                     | trnL-CAA tRNA | 98,211  | 98,291  | 81 |
|                     | trnI-CAU tRNA | 90,202  | 90,275  | 74 |
|                     | trnP-UGG tRNA | 70,023  | 70,096  | 74 |
|                     | trnW-CCA tRNA | 69,766  | 69,838  | 73 |
|                     | trnM-CAU tRNA | 54,981  | 55,052  | 72 |
|                     | trnV-UAC tRNA | 54,104  | 54,785  | 75 |
|                     | trnF-GAA tRNA | 50,793  | 50,865  | 73 |

|                      |                |         |         |    |
|----------------------|----------------|---------|---------|----|
|                      | trnL-UAA tRNA  | 49,761  | 50,393  | 89 |
|                      | trnT-UGU tRNA  | 48,360  | 48,432  | 73 |
|                      | trnS-GGA tRNA  | 46,866  | 46,952  | 87 |
|                      | trnfM-CAU tRNA | 38,486  | 38,559  | 74 |
|                      | trnG-GCC tRNA  | 38,262  | 38,332  | 71 |
|                      | trnS-UGA tRNA  | 36,958  | 37,050  | 93 |
|                      | trnT-GGU tRNA  | 32,785  | 32,856  | 72 |
|                      | trnE-UUC tRNA  | 31,914  | 31,986  | 73 |
|                      | trnY-GUA tRNA  | 31,771  | 31,854  | 84 |
|                      | trnD-GUC tRNA  | 31,199  | 31,272  | 74 |
|                      | trnC-GCA tRNA  | 28,718  | 28,798  | 81 |
|                      | trnR-UCU tRNA  | 10,120  | 10,191  | 72 |
|                      | trnG-GCC tRNA  | 9,092   | 9,915   | 71 |
|                      | trnS-GCU tRNA  | 8,143   | 8,230   | 88 |
|                      | trnQ-UUG tRNA  | 6,935   | 7,006   | 72 |
|                      | trnK-UUU tRNA  | 1,786   | 4,384   | 72 |
|                      | trnH-GUG tRNA  | 6       | 80      | 75 |
| <i>G. longicalyx</i> | trnI-CAU tRNA  | 158,119 | 158,192 | 74 |
|                      | trnL-CAA tRNA  | 150,096 | 150,176 | 81 |
|                      | trnV-GAC tRNA  | 143,595 | 143,666 | 72 |
|                      | trnI-GAU tRNA  | 140,553 | 141,583 | 77 |
|                      | trnA-UGC       | 139,620 | 140,489 | 73 |
|                      | trnR-ACG tRNA  | 135,693 | 135,766 | 74 |
|                      | trnN-GUU tRNA  | 134,990 | 135,061 | 72 |
|                      | trnL-UAG tRNA  | 129,626 | 129,705 | 80 |
|                      | trnN-GUU tRNA  | 113,849 | 113,919 | 71 |
|                      | trnR-ACG tRNA  | 113,143 | 113,215 | 73 |
|                      | trnA-UGC       | 108,420 | 109,289 | 73 |
|                      | trnI-GAU tRNA  | 107,326 | 108,356 | 76 |
|                      | trnV-GAC tRNA  | 105,243 | 105,314 | 72 |
|                      | trnL-CAA tRNA  | 98,733  | 98,813  | 81 |
|                      | trnI-CAU tRNA  | 90,717  | 90,790  | 74 |
|                      | trnP-UGG tRNA  | 70,517  | 70,590  | 74 |
|                      | trnW-CCA tRNA  | 70,261  | 70,333  | 73 |
|                      | trnM-CAU tRNA  | 55,474  | 55,545  | 72 |
|                      | trnV-UAC tRNA  | 54,597  | 55,278  | 76 |
|                      | trnF-GAA tRNA  | 51,235  | 51,307  | 73 |
|                      | trnL-UAA tRNA  | 50,170  | 50,838  | 77 |
|                      | trnT-UGU tRNA  | 48,749  | 48,821  | 73 |
|                      | trnS-GGA tRNA  | 47,246  | 47,332  | 87 |
|                      | trnfM-CAU tRNA | 38,827  | 38,900  | 74 |
|                      | trnG-GCC tRNA  | 38,604  | 38,674  | 71 |
|                      | trnS-UGA tRNA  | 37,232  | 37,324  | 93 |

|                    |                |         |         |    |
|--------------------|----------------|---------|---------|----|
|                    | trnT-GGU tRNA  | 33,039  | 33,110  | 72 |
|                    | trnE-UUC tRNA  | 32,117  | 32,189  | 73 |
|                    | trnY-GUA tRNA  | 31,974  | 32,057  | 84 |
|                    | trnD-GUA tRNA  | 31,398  | 31,471  | 74 |
|                    | trnC-GCA tRNA  | 28,898  | 28,978  | 81 |
|                    | trnR-UCU tRNA  | 10,198  | 10,269  | 72 |
|                    | trnG-UCC tRNA  | 9,128   | 10,002  | 70 |
|                    | trnS-GCU tRNA  | 8,158   | 8,245   | 88 |
|                    | trnQ-UUG tRNA  | 6,949   | 7,020   | 72 |
|                    | trnK-UUU tRNA  | 1,794   | 4,394   | 72 |
|                    | trnH-GUG tRNA  | 1       | 74      | 74 |
| <i>G. hirsutum</i> | trnI-CAU tRNA  | 158,157 | 158,230 | 74 |
|                    | trnL-CAA tRNA  | 150,134 | 150,214 | 81 |
|                    | trnV-GAC tRNA  | 143,641 | 143,712 | 72 |
|                    | trnI-GAU tRNA  | 140,600 | 141,630 | 77 |
|                    | trnA-UGC       | 139,667 | 140,536 | 73 |
|                    | trnR-ACG tRNA  | 135,759 | 135,832 | 74 |
|                    | trnN-GUU tRNA  | 135,061 | 135,132 | 72 |
|                    | trnL-UAG tRNA  | 129,681 | 129,760 | 80 |
|                    | trnN-GUU tRNA  | 113,924 | 113,995 | 72 |
|                    | trnR-ACG tRNA  | 113,224 | 113,297 | 74 |
|                    | trnA-UGC       | 108,520 | 109,389 | 73 |
|                    | trnI-GAU tRNA  | 107,426 | 108,456 | 77 |
|                    | trnV-GAC tRNA  | 105,344 | 105,415 | 72 |
|                    | trnL-CAA tRNA  | 98,842  | 98,922  | 81 |
|                    | trnI-CAU tRNA  | 90,826  | 90,899  | 74 |
|                    | trnP-UGG tRNA  | 70,646  | 70,719  | 74 |
|                    | trnW-CCA tRNA  | 70,394  | 70,466  | 73 |
|                    | trnM-CAU tRNA  | 55,555  | 55,626  | 72 |
|                    | trnV-UAC tRNA  | 54,678  | 55,359  | 75 |
|                    | trnF-GAA tRNA  | 51,288  | 51,360  | 73 |
|                    | trnL-UAA tRNA  | 50,230  | 50,891  | 89 |
|                    | trnT-UGU tRNA  | 48,828  | 48,900  | 73 |
|                    | trnS-GGA tRNA  | 47,306  | 47,392  | 87 |
|                    | trnfM-CAU tRNA | 38,878  | 38,951  | 74 |
|                    | trnG-GCC tRNA  | 38,655  | 38,725  | 71 |
|                    | trnS-UGA tRNA  | 37,283  | 37,375  | 93 |
|                    | trnT-GGU tRNA  | 33,077  | 33,148  | 72 |
|                    | trnE-UUC tRNA  | 32,159  | 32,231  | 73 |
|                    | trnY-GUA tRNA  | 32,016  | 32,099  | 84 |
|                    | trnD-GUC tRNA  | 31,445  | 31,518  | 74 |
|                    | trnC-GCA tRNA  | 28,902  | 28,982  | 81 |
|                    | trnR-UCU tRNA  | 10,222  | 10,293  | 72 |

|                      |               |         |         |    |
|----------------------|---------------|---------|---------|----|
|                      | trnG-GCC tRNA | 9,164   | 9,996   | 71 |
|                      | trnS-GCU tRNA | 8,180   | 8,267   | 88 |
|                      | trnQ-UUG tRNA | 6,977   | 7,048   | 72 |
|                      | trnK-UUU tRNA | 1,822   | 4,435   | 72 |
|                      | trnH-GUG tRNA | 14      | 88      | 75 |
| <i>G. barbadense</i> | trnI-CAU tRNA | 158,188 | 158,261 | 74 |
|                      | trnL-CAA tRNA | 150,165 | 150,245 | 81 |
|                      | trnV-GAC tRNA | 143,671 | 143,742 | 72 |
|                      | trnI-GAU tRNA | 140,630 | 141,660 | 77 |
|                      | trnA-UGC      | 139,697 | 140,566 | 73 |
|                      | trnR-ACG tRNA | 135,793 | 135,866 | 74 |
|                      | trnN-GUU tRNA | 135,095 | 135,166 | 72 |
|                      | trnL-UAG tRNA | 129,716 | 129,795 | 80 |
|                      | trnN-GUU tRNA | 113,964 | 114,035 | 72 |
|                      | trnR-ACG tRNA | 113,264 | 113,337 | 74 |
|                      | trnA-UGC      | 108,564 | 109,433 | 73 |
|                      | trnI-GAU tRNA | 107,470 | 108,500 | 77 |
|                      | trnV-GAC tRNA | 105,388 | 105,459 | 72 |
|                      | trnL-CAA tRNA | 98,885  | 98,965  | 81 |
|                      | trnI-CAU tRNA | 90,869  | 90,942  | 74 |
|                      | trnP-UGG tRNA | 70,697  | 70,770  | 74 |
|                      | trnW-CCA tRNA | 70,447  | 70,519  | 73 |
|                      | trnM-CAU tRNA | 55,630  | 55,701  | 72 |
|                      | trnV-UAC tRNA | 54,753  | 55,434  | 75 |
|                      | trnF-GAA tRNA | 51,357  | 51,429  | 73 |
|                      | trnL-UAA tRNA | 50,293  | 50,960  | 89 |
|                      | trnT-UGU tRNA | 48,869  | 48,941  | 73 |
|                      | trnS-GGA tRNA | 47,350  | 47,436  | 87 |
|                      | trnM-CAU tRNA | 38,918  | 38,991  | 74 |
|                      | trnG-GCC tRNA | 38,694  | 38,764  | 71 |
|                      | trnS-UGA tRNA | 37,214  | 37,306  | 93 |
|                      | trnT-GGU tRNA | 33,022  | 33,093  | 72 |
|                      | trnE-UUC tRNA | 32,108  | 32,180  | 73 |
|                      | trnY-GUA tRNA | 31,965  | 32,048  | 84 |
|                      | trnD-GUC tRNA | 31,389  | 31,462  | 74 |
|                      | trnC-GCA tRNA | 28,896  | 28,976  | 81 |
|                      | trnR-UCU tRNA | 10,233  | 10,304  | 72 |
|                      | trnG-GCC tRNA | 9,175   | 10,007  | 71 |
|                      | trnS-GCU tRNA | 8,191   | 8,278   | 88 |
|                      | trnQ-UUG tRNA | 6,983   | 7,054   | 72 |
|                      | trnK-UUU tRNA | 1,829   | 4,436   | 72 |
|                      | trnH-GUG tRNA | 14      | 88      | 75 |
| <i>G. bickii</i>     | trnI-CAU tRNA | 157,295 | 157,368 | 74 |

|                        |               |         |         |    |
|------------------------|---------------|---------|---------|----|
|                        | trnL-CAA tRNA | 149,272 | 149,352 | 81 |
|                        | trnV-GAC tRNA | 142,803 | 142,874 | 72 |
|                        | trnI-GAU tRNA | 139,763 | 140,792 | 77 |
|                        | trnA-UGC      | 138,830 | 139,699 | 73 |
|                        | trnR-ACG tRNA | 134,938 | 135,011 | 74 |
|                        | trnN-GUU tRNA | 134,235 | 134,306 | 72 |
|                        | trnL-UAG tRNA | 128,975 | 129,054 | 80 |
|                        | trnN-GUU tRNA | 113,190 | 113,261 | 72 |
|                        | trnR-ACG tRNA | 112,485 | 112,558 | 74 |
|                        | trnA-UGC      | 107,797 | 108,666 | 73 |
|                        | trnI-GAU tRNA | 106,704 | 107,733 | 76 |
|                        | trnV-GAC tRNA | 104,622 | 104,693 | 72 |
|                        | trnL-CAA tRNA | 98,144  | 98,224  | 81 |
|                        | trnI-CAU tRNA | 90,128  | 90,201  | 74 |
|                        | trnP-UGG tRNA | 70,000  | 70,073  | 74 |
|                        | trnW-CCA tRNA | 69,734  | 69,806  | 73 |
|                        | trnM-CAU tRNA | 54,819  | 54,891  | 73 |
|                        | trnV-UAC tRNA | 53,945  | 54,624  | 76 |
|                        | trnF-GAA tRNA | 50,602  | 50,674  | 73 |
|                        | trnL-UAA tRNA | 49,547  | 50,202  | 87 |
|                        | trnT-UGU tRNA | 48,169  | 48,241  | 73 |
|                        | trnS-GGA tRNA | 46,708  | 46,794  | 87 |
|                        | trnG-GCC tRNA | 38,084  | 38,154  | 71 |
|                        | trnS-UGA tRNA | 36,776  | 36,868  | 93 |
|                        | trnT-GGU tRNA | 32,595  | 32,666  | 72 |
|                        | trnE-UUC tRNA | 31,679  | 31,751  | 73 |
|                        | trnY-GUA tRNA | 31,536  | 31,619  | 84 |
|                        | trnD-GUC tRNA | 30,959  | 31,032  | 74 |
|                        | trnC-GCA tRNA | 28,730  | 28,810  | 81 |
|                        | trnR-UCU tRNA | 10,111  | 10,182  | 72 |
|                        | trnG-UCC tRNA | 9,053   | 9,915   | 70 |
|                        | trnS-GCU tRNA | 8,092   | 8,179   | 88 |
|                        | trnQ-UUG tRNA | 6,873   | 6,944   | 72 |
|                        | trnK-UUU tRNA | 1,805   | 4,414   | 72 |
|                        | trnH-GUG tRNA | 1       | 71      | 71 |
| <i>G. populifolium</i> | trnI-CAU tRNA | 157,311 | 157,384 | 74 |
|                        | trnL-CAA tRNA | 149,288 | 149,368 | 81 |
|                        | trnV-GAC tRNA | 142,829 | 142,900 | 72 |
|                        | trnI-GAU tRNA | 139,789 | 140,818 | 77 |
|                        | trnA-UGC      | 138,856 | 139,725 | 73 |
|                        | trnR-ACG tRNA | 134,964 | 135,037 | 74 |
|                        | trnN-GUU tRNA | 134,261 | 134,332 | 72 |
|                        | trnL-UAG tRNA | 129,097 | 129,176 | 80 |



|  |               |         |         |    |
|--|---------------|---------|---------|----|
|  | trnN-GUU tRNA | 113,310 | 113,381 | 72 |
|  | trnR-ACG tRNA | 112,605 | 112,678 | 74 |
|  | trnA-UGC      | 107,917 | 108,786 | 73 |
|  | trnI-GAU tRNA | 106,824 | 107,853 | 77 |
|  | trnV-GAC tRNA | 104,742 | 104,813 | 72 |
|  | trnL-CAA tRNA | 98,274  | 98,354  | 81 |
|  | trnI-CAU tRNA | 90,258  | 90,331  | 74 |
|  | trnP-UGG tRNA | 69,975  | 70,048  | 74 |
|  | trnW-CCA tRNA | 69,709  | 69,781  | 73 |
|  | trnM-CAU tRNA | 54,841  | 54,913  | 73 |
|  | trnV-UAC tRNA | 53,966  | 54,646  | 75 |
|  | trnF-GAA tRNA | 50,672  | 50,744  | 73 |
|  | trnL-UAA tRNA | 49,616  | 50,274  | 87 |
|  | trnT-UGU tRNA | 48,155  | 48,227  | 73 |
|  | trnS-GGA tRNA | 46,650  | 46,736  | 87 |
|  | trnM-CAU tRNA | 38,208  | 38,281  | 74 |
|  | trnG-UCC tRNA | 37,985  | 38,055  | 71 |
|  | trnS-UGA tRNA | 36,711  | 36,803  | 93 |
|  | trnT-GGU tRNA | 32,528  | 32,599  | 72 |
|  | trnE-UUC tRNA | 31,641  | 31,713  | 73 |
|  | trnY-GUA tRNA | 31,498  | 31,581  | 84 |
|  | trnD-GUC tRNA | 31,054  | 31,127  | 74 |
|  | trnC-GCA tRNA | 28,813  | 28,893  | 81 |
|  | trnR-UCU tRNA | 10,180  | 10,251  | 72 |
|  | trnG-GCC tRNA | 9,134   | 9,984   | 70 |
|  | trnS-GCU tRNA | 8,166   | 8,253   | 88 |
|  | trnQ-UUG tRNA | 6,956   | 7,027   | 72 |
|  | trnK-UUU tRNA | 1,804   | 4,413   | 72 |
|  | trnH-GUG tRNA | 1       | 74      | 74 |
