# Supplementary figures and images for: Novel Structural Variation and Evolutionary Characteristics of Chloroplast tRNA in Gossypium Plants
Source: MDPI journal article supplement (doi:10.3390/genes12060822), 2021-05-27

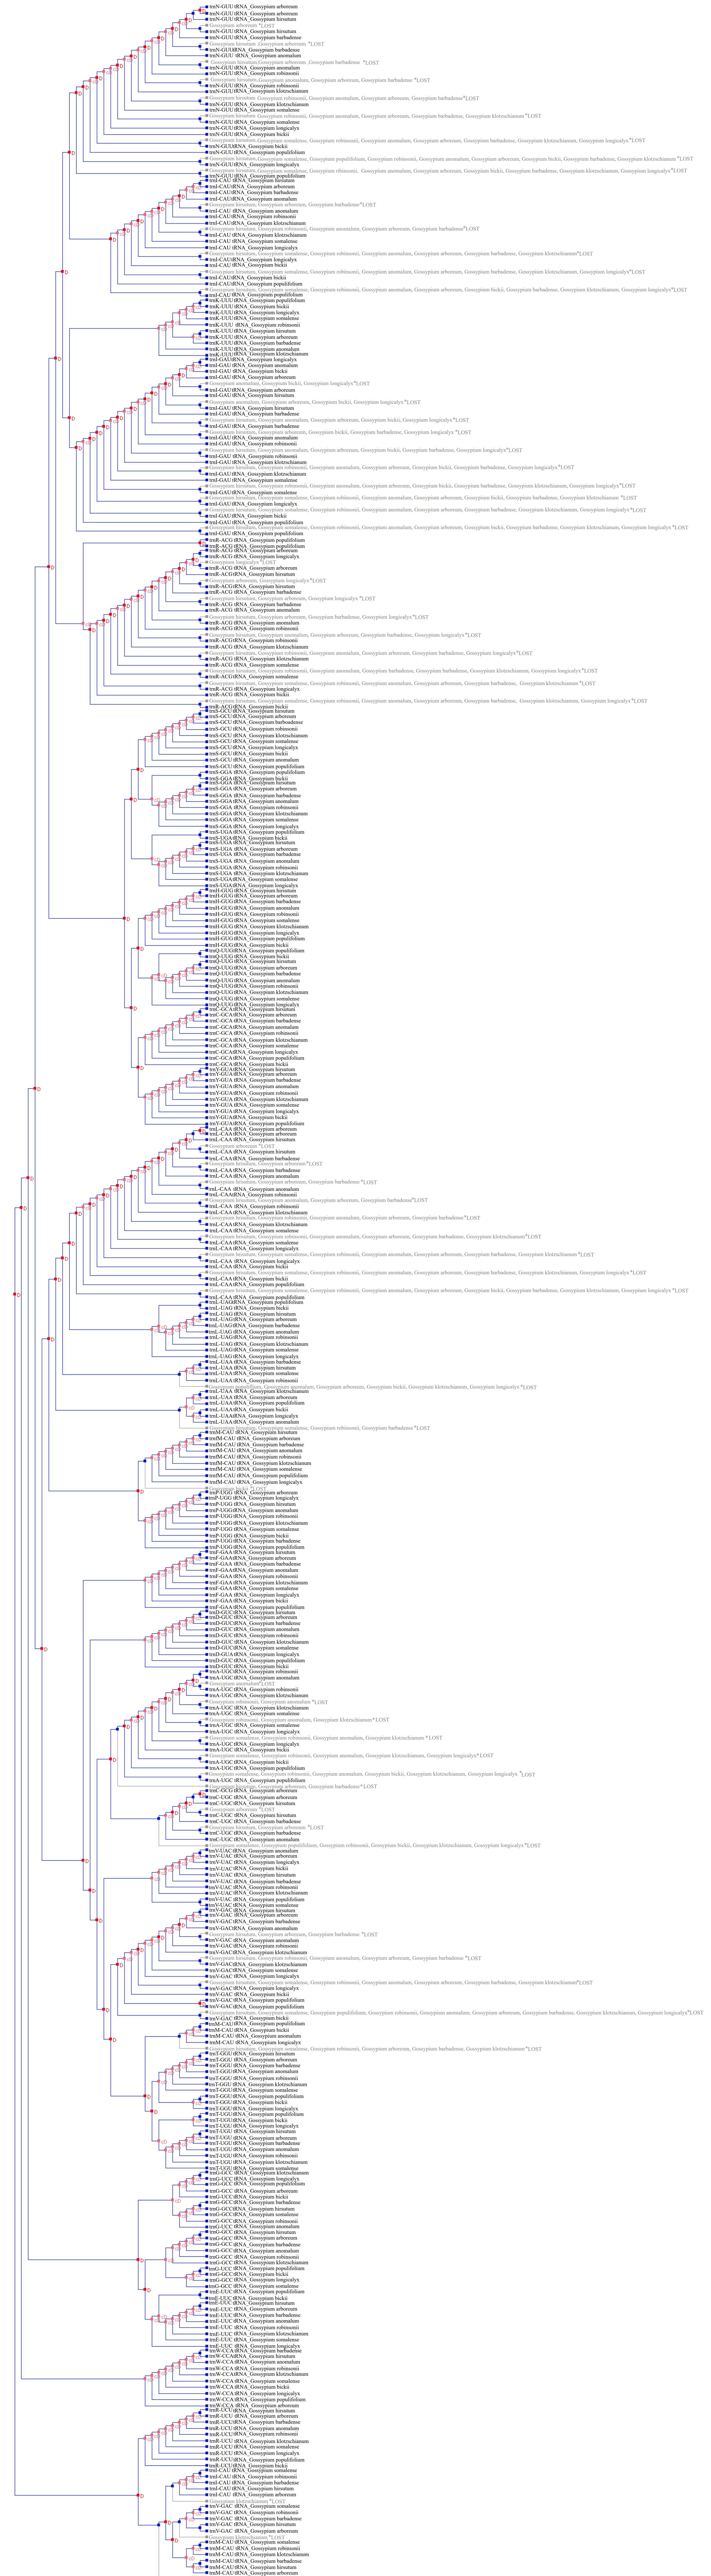

Supplement: s1 [file s1]
